# Supplementary material for: Palladium-catalyzed direct ortho C–O bond construction of azoxybenzenes with carboxylic acids and alcohols
Source: Royal Society of Chemistry journal article supplement (doi:10.1039/c5qo00120j), 2015-01-01
Supplement: c5qo00120j1.pdf [file c5qo00120j1.pdf]

## Supporting information for

# Palladium-Catalyzed Direct *ortho* C-O Bond Construction of Azoxybenzenes with Carboxylic Acids and Alcohols

Duo Zhang,<sup>a</sup> Xiuling Cui,<sup>\*a,b</sup> Fangfang Yang,<sup>a</sup> Qianqian Zhang,<sup>a</sup> Yu Zhu,<sup>a</sup> and  
Yangjie Wu<sup>\*a</sup>

<sup>a</sup> Department of Chemistry, Henan Key Laboratory of Chemical Biology and Organic Chemistry, Key Laboratory of Applied Chemistry of Henan Universities, Zhengzhou University, Zhengzhou 450052, P. R. China

<sup>b</sup> Xiamen Key Laboratory of Ocean and Gene Drugs, School of Biomedical Sciences and Institute of Molecular Medicine of Huaqiao University & Engineering Research Centre of Molecular Medicine of Chinese Education Ministry, Fujian, Xiamen 361021, P. R. China

## Contents

|                                                                        |    |
|------------------------------------------------------------------------|----|
| 1. General Information.....                                            | 1  |
| 2. Typical procedure for the synthesis of azoxybenzenes.....           | 2  |
| 3. Experimental procedures .....                                       | 2  |
| 4. Characterization data for the products .....                        | 3  |
| 5. References.....                                                     | 11 |
| 6. <sup>1</sup> H and <sup>13</sup> C NMR spectra of the products..... | 11 |
| 7. X-ray Structure of 3q、4l and Compelx I. ....                        | 40 |

## 1. General Information

Unless otherwise noted, all reagents were purchased from commercial suppliers and used without purification. Melting points were measured on a microscopic apparatus and were uncorrected. <sup>1</sup>H NMR spectra were recorded on a 400 MHz spectrometer in deuterated chloroform. The chemical shifts  $\delta$  are reported in ppm relative to tetramethylsilane. The multiplicity of signals was designated by the following abbreviations: s (singlet), d (doublet), t (triplet), q (quartet), m (multiplet). Coupling constants, *J*, were reported in Hertz (Hz). <sup>13</sup>C NMR spectra were recorded at 100

MHz spectrometer. The chemical shifts  $\delta$  were reported relative to residual  $\text{CHCl}_3$  ( $\delta_c = 77.00$  ppm). High resolution mass spectra (HR-MS) were obtained on a Q-TOF spectrometer with micromass MS software using electrospray ionization (ESI). X-ray analysis was obtained with an X-ray single crystal diffractometer.

## 2. Typical procedure for the synthesis of azoxybenzenes

All of the azoxybenzenes were prepared from arylamines, according to the literature.<sup>[1]</sup>  $\text{H}_2\text{O}_2$  (30%, 0.92 mL, 9.00 mmol) was added to a solution of arylamine (0.27 mL, 3.00 mmol) and  $\text{SeO}_2$  (33.3 mg, 0.30 mmol) in MeOH (10 mL). The reaction mixture was stirred at room temperature until complete consumption of the starting material was observed by TLC (20 h). The solvent was evaporated under vacuum, the residue was partitioned between  $\text{CH}_2\text{Cl}_2$  (20 mL) and  $\text{H}_2\text{O}$  (20 mL). The layers were separated, and the aqueous layer was extracted with  $\text{CH}_2\text{Cl}_2$  ( $2 \times 20$  mL). The combined organic layers were dried ( $\text{MgSO}_4$ ) and concentrated in vacuo. The crude product was purified by column chromatography on silica gel ( $\text{CH}_2\text{Cl}_2/\text{pentane}=1:10$ ) to afford the desired azoxybenzene derivatives.

## 3. Experimental procedures

**(Z)-1-(2-acetoxphenyl)-2-phenyldiazene oxide (3a):** In the oil bath, to a 5 mL reaction tube were successively added azoxybenzene (**1a**) (39.6 mg, 0.2 mmol), acetic acid (**2a'**) (2.0 ml),  $\text{Pd}(\text{TFA})_2$  (1.7 mg, 0.005 mmol),  $\text{K}_2\text{S}_2\text{O}_8$  (108.0 mg, 0.4 mmol). The mixture was stirred on a heating block at 100 °C for 14 h. (Note: The reaction was sluggish at temperatures below 100 °C.)

**(Z)-1-(2-methoxyphenyl)-2-phenyldiazene oxide (4a):** In the oil bath, to a 5 mL reaction tube were successively added azoxybenzene (**1a**) (39.6 mg, 0.2 mmol), alcohol (**2a'**) (2.0 ml),  $\text{Pd}(\text{TFA})_2$  (1.7 mg, 0.02 mmol),  $\text{PhI}(\text{OAc})_2$  (128.8 mg, 0.4 mmol) and TFA (18.0 equiv.). The mixture was stirred at room temperature for 20 h.

After cooling to ambient temperature, the resulting mixture was filtered through a pad of tripolite and washed with 50 mL of ethyl acetate. The filtrate was concentrated in vacuum and the resulting residue was purified by preparative thin layer chromatography (silica gel: ethyl acetate / petroleum ether = 1 : 10, v/v) to afford the target product **3a** as a pale yellow liquid (44.1 mg, 86%) and **4a** as a pale yellow solid (36.5 mg, 80%), respectively.

#### 4. Characterization data for the products

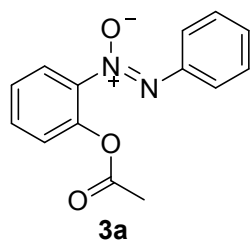

**(3a) (Z)-1-(2-acetoxphenyl)-2-phenyldiazene oxide:** light yellow liquid;  $^1\text{H}$  NMR (400 MHz,  $\text{CDCl}_3$ )  $\delta$  8.09 (d,  $J = 7.8$  Hz, 2H), 7.91 (d,  $J = 8.0$  Hz, 1H), 7.44 (t,  $J = 9.3$  Hz, 3H), 7.37 – 7.28(m, 2H), 7.18 (d,  $J = 8.0$  Hz, 1H), 2.1 (s, 3H);  $^{13}\text{C}$  NMR (100 MHz,  $\text{CDCl}_3$ )  $\delta$  ppm 169.0, 144.4, 143.5, 131.93, 130.5, 129.3, 126.9, 125.7, 125.5, 125.0, 21.2; HR-MS (ESI) ( $[\text{M}+\text{Na}]^+$ ) Calcd. for  $\text{C}_{14}\text{H}_{12}\text{N}_2\text{O}_3\text{Na}^+$ : 279.0740, found: 279.0742.

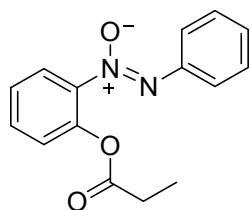

**(3b) (Z)-2-phenyl-1-(2-(propionyloxy)phenyl)diazene oxide:** light yellow liquid;  $^1\text{H}$  NMR (400 MHz,  $\text{CDCl}_3$ )  $\delta$  8.09 (d,  $J = 7.9$  Hz, 2H), 7.93 (d,  $J = 4.0$  Hz, 1H), 7.54 – 7.46(m, 3H), 7.42–7.35(m, 2H), 7.24 (d,  $J = 7.9$  Hz, 1H), 2.58 (dd,  $J = 14.96$  Hz,  $J = 7.48$  Hz, 2H), 1.20 (q,  $J = 6.4$  Hz, 3H);  $^{13}\text{C}$  NMR (100 MHz,  $\text{CDCl}_3$ )  $\delta$  ppm 171.1, 143.0, 142.2, 130.4, 129.0, 127.8, 125.3, 124.3, 124.1, 123.6, 26.5, 7.9; HR-MS (ESI) ( $[\text{M}+\text{Na}]^+$ ) Calcd. for  $\text{C}_{15}\text{H}_{14}\text{N}_2\text{O}_3\text{Na}^+$ : 293.0897, found: 293.0899.

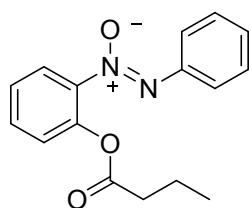

**(3c) (Z)-1-(2-(butyryloxy)phenyl)-2-phenyldiazene oxide:** light yellow liquid;  $^1\text{H}$  NMR (400 MHz,  $\text{CDCl}_3$ )  $\delta$  8.10 (d,  $J = 7.8$  Hz, 2H), 7.93 (d,  $J = 7.5$  Hz, 1H), 7.55 – 7.47(m, 3H), 7.43–7.36(m, 2H), 7.24 (d,  $J = 8.2$  Hz, 1H), 2.53 (t,  $J = 7.6$  Hz, 2H), 1.78 – 1.68(m, 2H), 0.98 (t,  $J = 6.5$  Hz, 3H);  $^{13}\text{C}$  NMR (100 MHz,  $\text{CDCl}_3$ )  $\delta$  ppm 170.2, 143.0, 142.1, 130.4, 129.0, 127.8, 125.3, 124.3, 124.1, 123.6, 34.9, 17.1, 12.6; HR-MS (ESI) ( $[\text{M}+\text{Na}]^+$ ) Calcd. for  $\text{C}_{16}\text{H}_{16}\text{N}_2\text{O}_3\text{Na}^+$ : 307.1053, found: 307.1059.

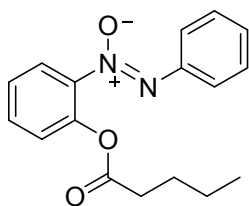

**(3d) (Z)-1-(2-(pentanoyloxy)phenyl)-2-phenyldiazene oxide:** light yellow liquid;  $^1\text{H}$  NMR (400 MHz,  $\text{CDCl}_3$ )  $\delta$  8.09 (d,  $J = 7.7$  Hz, 2H), 7.91 (d,  $J = 4.1$  Hz, 1H), 7.54 – 7.46 (m, 3H), 7.42–7.35 (m, 2H), 7.22 (d,  $J = 8.2$  Hz, 1H), 2.54 (t,  $J = 8.1$  Hz, 2H), 1.70 – 1.62 (m, 2H), 1.41 – 1.32 (m, 2H), 0.87 (t,  $J = 5.5$  Hz, 3H);  $^{13}\text{C}$  NMR (100 MHz,  $\text{CDCl}_3$ )  $\delta$  ppm 171.8, 144.4, 143.5, 131.4, 130.4, 129.1, 126.7, 125.7, 125.4, 125.0, 34.2, 27.1, 22.6, 14.0; HR-MS (ESI) ( $[\text{M}+\text{Na}]^+$ ) Calcd. for  $\text{C}_{17}\text{H}_{18}\text{N}_2\text{O}_3\text{Na}^+$ : 321.1210, found: 321.1214.

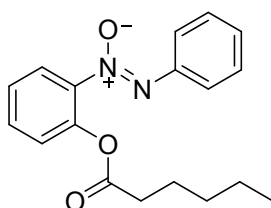

**(3e) (Z)-1-(2-(2-hexanoyloxy)phenyl)-2-phenyldiazene oxide:** light yellow liquid;  $^1\text{H}$  NMR (400 MHz,  $\text{CDCl}_3$ )  $\delta$  8.09 (d,  $J = 7.8$  Hz, 2H), 7.90 (d,  $J = 8.0$  Hz, 1H), 7.54 – 7.45 (m, 3H), 7.42–7.35 (m, 2H), 7.23 (d,  $J = 8.1$  Hz, 1H), 2.53 (t,  $J = 9.5$  Hz, 2H), 1.71 – 1.64 (m, 2H), 1.30 – 1.25 (m, 4H), 0.86 (t,  $J = 7.7$  Hz, 3H);  $^{13}\text{C}$  NMR (100 MHz,  $\text{CDCl}_3$ )  $\delta$  ppm 171.8, 144.4, 143.5, 131.7, 130.4, 129.1, 126.7, 125.7, 125.4, 125.0, 34.4, 31.6, 24.7, 22.6, 14.2; HR-MS (ESI) ( $[\text{M}+\text{Na}]^+$ ) Calcd. for  $\text{C}_{18}\text{H}_{20}\text{N}_2\text{O}_3\text{Na}^+$ : 335.1366, found: 335.1371.

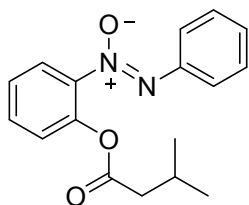

**(3f) (Z)-1-(2-((3-methylbutanoyl)oxy)phenyl)-2-phenyldiazene oxide:** light yellow liquid;  $^1\text{H}$  NMR (400 MHz,  $\text{CDCl}_3$ )  $\delta$  8.10 (d,  $J = 7.8$  Hz, 2H), 7.91 (d,  $J = 8.0$  Hz, 1H), 7.53 – 7.46 (m, 3H), 7.42–7.35 (m, 2H), 7.23 (d,  $J = 8.1$  Hz, 1H), 2.42 (d,  $J = 7.1$  Hz, 2H), 2.23 – 2.13 (m, 1H), 0.98 (d,  $J = 6.6$  Hz, 6H);  $^{13}\text{C}$  NMR (100 MHz,  $\text{CDCl}_3$ )  $\delta$  ppm 171.0, 144.4, 143.4, 131.7, 130.4, 129.1, 126.7, 125.7, 125.4, 125.0, 43.3, 25.8, 22.8; HR-MS (ESI) ( $[\text{M}+\text{Na}]^+$ ) Calcd. for  $\text{C}_{17}\text{H}_{18}\text{N}_2\text{O}_3\text{Na}^+$ : 321.1210, found: 321.1215.

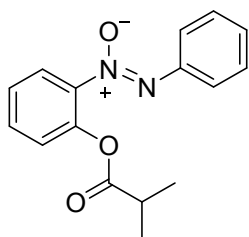

**(3g) (Z)-1-(2-(isobutyloxy)phenyl)-2-phenyldiazene oxide:** light yellow liquid;  $^1\text{H}$  NMR (400

MHz, CDCl<sub>3</sub>) δ 8.09 (d, *J* = 7.7 Hz, 2H), 7.90 (d, *J* = 7.6 Hz, 1H), 7.54 – 7.46 (m, 3H), 7.42–7.34 (m, 2H), 7.24 (d, *J* = 7.9 Hz, 1H), 2.83 – 2.76 (m, 1H), 1.25 (d, *J* = 7.1 Hz, 6H); <sup>13</sup>C NMR (100 MHz, CDCl<sub>3</sub>) δ ppm 173.5, 143.0, 142.2, 130.3, 129.0, 127.7, 125.3, 124.3, 124.0, 123.5, 34.0, 17.8; HR-MS (ESI) ([M+Na]<sup>+</sup>) Calcd. for C<sub>16</sub>H<sub>16</sub>N<sub>2</sub>O<sub>3</sub>Na<sup>+</sup>: 307.1053, found: 307.1057.

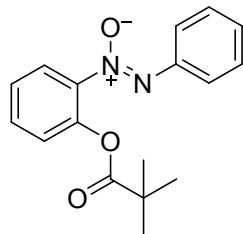

**(3h) (Z)-2-phenyl-1-(2-pivaloyloxy)phenyl)diazene oxide:** light yellow liquid; <sup>1</sup>H NMR (400 MHz, CDCl<sub>3</sub>) δ 8.09 (d, *J* = 7.5 Hz, 2H), 7.86 (d, *J* = 8.0 Hz, 1H), 7.53 – 7.45 (m, 3H), 7.41–7.34 (m, 2H), 7.21 (d, *J* = 8.0 Hz, 1H), 1.27 (s, 9H); <sup>13</sup>C NMR (100 MHz, CDCl<sub>3</sub>) δ ppm 174.9, 143.0, 142.3, 130.1, 128.9, 127.7, 125.1, 124.3, 123.8, 123.3, 38.1, 26.1; HR-MS (ESI) ([M+Na]<sup>+</sup>) Calcd. for C<sub>17</sub>H<sub>18</sub>N<sub>2</sub>O<sub>3</sub>Na<sup>+</sup>: 321.1210, found: 321.1215.

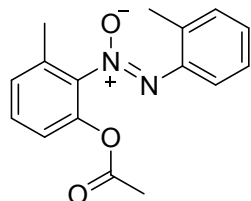

**(3i) (Z)-1-(2-acetoxy-6-methylphenyl)-2-(o-tolyl)diazene oxide:** light yellow liquid; <sup>1</sup>H NMR (400 MHz, CDCl<sub>3</sub>) δ 8.12 (d, *J* = 7.9 Hz, 1H), 7.40 – 7.29 (m, 4H), 7.22 (d, *J* = 7.6 Hz, 1H), 7.16 (d, *J* = 8.2 Hz, 1H), 2.46 (s, 3H), 2.39 (s, 3H), 2.24 (s, 3H); <sup>13</sup>C NMR (100 MHz, CDCl<sub>3</sub>) δ ppm 168.5, 142.9, 142.4, 130.9, 129.5, 128.5, 126.1, 121.6, 121.5, 20.8, 18.4, 17.0; HR-MS (ESI) ([M+H]<sup>+</sup>) Calcd. for C<sub>16</sub>H<sub>16</sub>N<sub>2</sub>O<sub>3</sub>Na<sup>+</sup>: 307.1053, found: 307.1056.

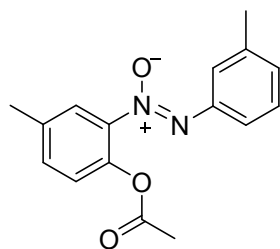

**(3j) (Z)-1-(2-acetoxy-5-methylphenyl)-2-(m-tolyl)diazene oxide:** light yellow liquid; <sup>1</sup>H NMR (400 MHz, CDCl<sub>3</sub>) δ 7.80–7.74 (m, 2H), 7.61 (s, 1H), 7.27–7.21 (m, 2H), 7.12 (d, *J* = 7.5 Hz, 1H), 6.99 (d, *J* = 8.2 Hz, 1H), 2.32 (s, 3H), 2.30 (s, 3H), 2.14 (s, 3H); <sup>13</sup>C NMR (100 MHz, CDCl<sub>3</sub>) δ ppm 168.9, 144.0, 141.0, 138.5, 136.7, 131.9, 130.7, 128.5, 125.7, 124.2, 122.3, 21.4, 20.8; HR-MS (ESI) ([M+H]<sup>+</sup>) Calcd. for C<sub>16</sub>H<sub>16</sub>N<sub>2</sub>O<sub>3</sub>Na<sup>+</sup>: 307.1053, found: 307.1056.

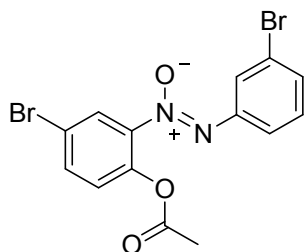

**(3k) (Z)-1-(2-acetoxy-5-bromophenyl)-2-(3-bromophenyl)diazene oxide:** light yellow liquid;  $^1\text{H}$  NMR (400 MHz,  $\text{CDCl}_3$ )  $\delta$  8.35 (s, 1H), 8.11 (s, 1H), 7.96 (d,  $J = 8.0$  Hz, 1H), 7.66 (d,  $J = 8.6$  Hz, 1H), 7.56 (d,  $J = 7.8$  Hz, 1H), 7.36 (t,  $J = 8.0$  Hz, 1H), 7.13 (d,  $J = 8.6$  Hz, 1H), 2.28 (s, 3H);  $^{13}\text{C}$  NMR (100 MHz,  $\text{CDCl}_3$ )  $\delta$  ppm 168.7, 145.1, 142.7, 135.2, 133.6, 130.5, 128.6, 128.3, 126.6, 124.7, 122.8, 119.4, 21.2; HR-MS (ESI) ( $[\text{M}+\text{H}]^+$ ) Calcd. for  $\text{C}_{14}\text{H}_{10}\text{Br}_2\text{N}_2\text{O}_3\text{Na}^+$ : 434.8950, found: 434.8954.

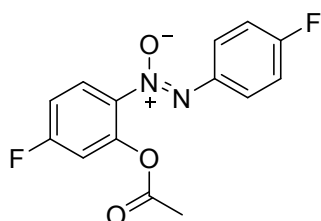

**(3l) (Z)-1-(2-acetoxy-4-fluorophenyl)-2-(4-fluorophenyl)diazene oxide:** light yellow liquid;  $^1\text{H}$  NMR (400 MHz,  $\text{CDCl}_3$ )  $\delta$  8.20 – 8.17(m, 2H), 7.91 (dd,  $J = 9.0$  Hz,  $J = 5.6$  Hz, 1H), 7.44 (t,  $J = 17.4$  Hz, 2H), 7.11 – 7.07(m, 1H), 6.98 (dd,  $J = 8.5$  Hz,  $J = 2.6$  Hz, 1H), 2.28 (s, 3H);  $^{13}\text{C}$  NMR (100 MHz,  $\text{CDCl}_3$ )  $\delta$  ppm 168.5, 164.6 (d,  $J_{\text{C-F}} = 46.7$  Hz), 162.1 (d,  $J_{\text{C-F}} = 45.8$  Hz), 144.8 (d,  $J_{\text{C-F}} = 11.6$  Hz), 140.8 (d,  $J_{\text{C-F}} = 3.27$  Hz), 128.2 (d,  $J_{\text{C-F}} = 8.5$  Hz), 127.1 (d,  $J_{\text{C-F}} = 10.0$  Hz), 116.2 (d,  $J_{\text{C-F}} = 22.4$  Hz), 113.9 (d,  $J_{\text{C-F}} = 22.7$  Hz), 112.7 (d,  $J_{\text{C-F}} = 25.2$  Hz), 21.2; HR-MS (ESI) ( $[\text{M}+\text{H}]^+$ ) Calcd. for  $\text{C}_{14}\text{H}_{11}\text{F}_2\text{N}_2\text{O}_3^+$ : 293.0735, found: 293.0732.

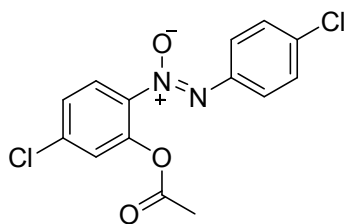

**(3m) (Z)-1-(2-acetoxy-4-chlorophenyl)-2-(4-chlorophenyl)diazene oxide:** light yellow solid; m.p. 57.9-58.6 °C  $^1\text{H}$  NMR (400 MHz,  $\text{CDCl}_3$ )  $\delta$  8.07 (d,  $J = 8.84$  Hz, 2H), 7.91 (d,  $J = 8.7$  Hz, 1H), 7.44 (d,  $J = 8.9$  Hz, 2H), 7.37 – 7.34(m, 1H), 7.26 (d,  $J = 2.2$  Hz, 1H), 2.27 (s, 3H);  $^{13}\text{C}$  NMR (100 MHz,  $\text{CDCl}_3$ )  $\delta$  ppm 168.6, 144.0, 142.6, 137.6, 136.0, 129.5, 127.2, 127.1, 126.5, 125.4, 21.2; HR-MS (ESI) ( $[\text{M}+\text{H}]^+$ ) Calcd. for  $\text{C}_{10}\text{H}_{11}\text{Cl}_2\text{N}_2\text{O}_3^+$ : 325.0141, found: 325.0141.

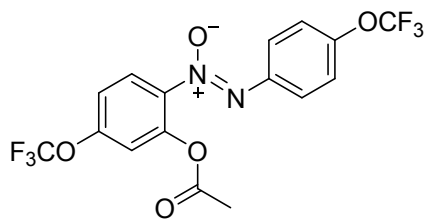

**3n**

**(3n) (Z)-1-(2-acetoxy-4-(trifluoromethoxy)phenyl)-2-(4-(trifluoromethoxy)phenyl)diazene oxide:** light yellow liquid;  $^1\text{H}$  NMR (400 MHz,  $\text{CDCl}_3$ )  $\delta$  8.18 (d,  $J = 9.0$  Hz, 2H), 8.02 (d,  $J = 9.0$  Hz, 1H), 7.32 (d,  $J = 8.7$  Hz, 2H), 7.25 (d,  $J = 11.36$  Hz, 1H), 7.14 (s, 1H), 2.30 (s, 3H);  $^{13}\text{C}$  NMR (100 MHz,  $\text{CDCl}_3$ )  $\delta$  ppm 168.35, 150.95 (dd,  $J_1 = 1.95$  Hz,  $J_2 = 3.83$  Hz), 149.90 (dd,  $J_1 = 1.94$  Hz,  $J_2 = 3.96$  Hz), 144.6, 142.4, 127.6, 126.9, 121.3, 118.6, 117.5, 21.1; HR-MS (ESI) ( $[\text{M}+\text{Na}]^+$ ) Calcd. for  $\text{C}_{16}\text{H}_{10}\text{F}_6\text{N}_2\text{O}_5\text{Na}^+$ : 447.0388, found: 447.0392.

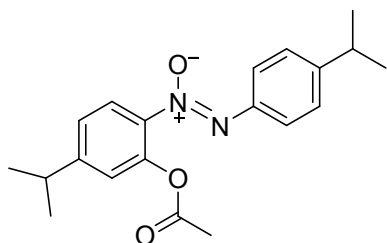

**(3o) (Z)-1-(2-acetoxy-4-isopropylphenyl)-2-(4-isopropylphenyl)diazene oxide:** light yellow liquid;  $^1\text{H}$  NMR (400 MHz,  $\text{CDCl}_3$ )  $\delta$  8.04 (d,  $J = 8.5$  Hz, 2H), 7.83 (d,  $J = 8.5$  Hz, 1H), 7.29 (d,  $J = 8.5$  Hz, 2H), 7.18 (dd,  $J = 8.2$  Hz,  $J = 1.6$  Hz, 1H), 7.02 (d,  $J = 1.5$  Hz, 1H), 2.98 – 2.89 (m, 2H), 2.24 (s, 3H), 1.24 (d,  $J = 6.9$  Hz, 12H);  $^{13}\text{C}$  NMR (100 MHz,  $\text{CDCl}_3$ )  $\delta$  ppm 169.2, 153.5, 151.7, 143.3, 142.5, 125.9, 125.4, 124.9, 122.7, 34.6, 34.3, 24.1, 24.0, 21.3; HR-MS (ESI) ( $[\text{M}+\text{H}]^+$ ) Calcd. for  $\text{C}_{20}\text{H}_{35}\text{N}_2\text{O}_3^+$ : 341.1860, found: 341.1862.

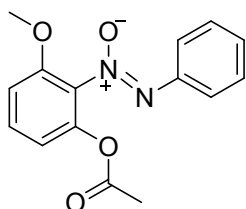

**(3p) (Z)-1-(2-acetoxy-6-methoxyphenyl)-2-phenyldiazene oxide:** light yellow liquid;  $^1\text{H}$  NMR (400 MHz,  $\text{CDCl}_3$ )  $\delta$  8.14 (d,  $J = 7.8$  Hz, 2H), 7.50 (t,  $J = 7.6$  Hz, 2H), 7.44-7.38 (m, 2H), 6.96-6.89 (m, 2H), 3.90 (s, 3H), 2.18 (s, 3H);  $^{13}\text{C}$  NMR (100 MHz,  $\text{CDCl}_3$ )  $\delta$  ppm 168.7, 153.2, 144.3, 144.3, 130.6, 130.4, 129.2, 125.8, 116.0, 110.4, 57.0, 21.1; HR-MS (ESI) ( $[\text{M}+\text{Na}]^+$ ) Calcd. for  $\text{C}_{15}\text{H}_{14}\text{N}_2\text{O}_4\text{Na}^+$ : 309.0846, found: 309.0854.

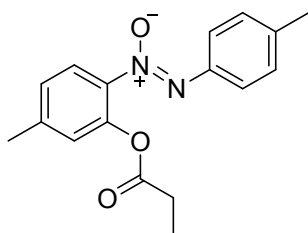

**(3q) (Z)-1-(4-methyl-2-(propionyloxy)phenyl)-2-(p-tolyl)diazene oxide:** light yellow solid; m.p. 65.2-66.3 °C  $^1\text{H}$  NMR (400 MHz,  $\text{CDCl}_3$ )  $\delta$  8.02 (d,  $J = 8.5$  Hz, 2H), 7.82 (d,  $J = 8.2$  Hz, 1H), 7.26 (d,  $J = 8.3$  Hz, 2H), 7.15 (d,  $J = 8.0$  Hz, 1H), 7.02 (s, 1H), 2.56 (dd,  $J = 14.9$  Hz,  $J = 7.4$  Hz, 3H), 2.43 (s, 3H), 2.40 (s, 3H), 1.19 (t,  $J = 7.6$  Hz, 3H);  $^{13}\text{C}$  NMR (100 MHz,  $\text{CDCl}_3$ )  $\delta$  ppm 172.6, 143.3, 142.6, 142.3, 140.8, 129.7, 127.3, 125.8, 125.3, 125.2, 27.9, 22.0, 21.6, 9.2; HR-MS (ESI) ( $[\text{M}+\text{H}]^+$ ) Calcd. for  $\text{C}_{17}\text{H}_{19}\text{N}_2\text{O}_3^+$ : 299.1390, found: 299.1392.

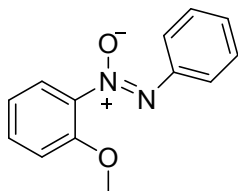

**(4a) (Z)-1-(2-methoxyphenyl)-2-phenyldiazene oxide:** light yellow solid; m.p. 45.7-46.5 °C  $^1\text{H}$  NMR (400 MHz,  $\text{CDCl}_3$ )  $\delta$  8.14 (d,  $J = 7.4$  Hz, 2H), 7.58 (d,  $J = 7.84$  Hz, 1H), 7.50 – 7.39 (m, 4H), 7.08 – 7.03 (m, 2H), 3.92 (s, 3H);  $^{13}\text{C}$  NMR (100 MHz,  $\text{CDCl}_3$ )  $\delta$  ppm 150.8, 143.2, 130.1, 128.8, 127.7, 124.4, 123.5, 119.5, 112.1, 55.3; HR-MS (ESI) ( $[\text{M}+\text{H}]^+$ ) Calcd. for  $\text{C}_{13}\text{H}_{13}\text{N}_2\text{O}_2^+$ : 229.0972, found: 229.0976.

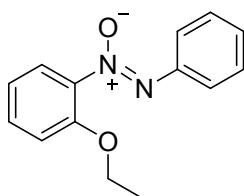

**(4b) (Z)-1-(2-ethoxyphenyl)-2-phenyldiazene oxide:** light yellow liquid;  $^1\text{H}$  NMR (400 MHz,  $\text{CDCl}_3$ )  $\delta$  8.10 (d,  $J = 7.9$  Hz, 2H), 7.58 (d,  $J = 7.8$  Hz, 1H), 7.48 (t,  $J = 7.0$  Hz, 2H), 7.43 – 7.38 (m, 2H), 7.04 – 7.01 (m, 2H), 4.17 (q,  $J = 6.7$  Hz, 2H), 1.40 (s, 3H);  $^{13}\text{C}$  NMR (100 MHz,  $\text{CDCl}_3$ )  $\delta$  ppm 151.5, 144.6, 131.4, 129.9, 129.1, 125.5, 124.8, 120.9, 114.6, 65.5, 15.1; HR-MS (ESI) ( $[\text{M}+\text{H}]^+$ ) Calcd. for  $\text{C}_{14}\text{H}_{15}\text{N}_2\text{O}_2^+$ : 243.1128, found: 243.1131.

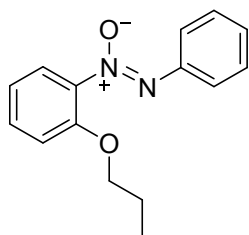

**(4c) (Z)-2-phenyl-1-(2-propoxyphenyl)diazene oxide:** light yellow liquid;  $^1\text{H}$  NMR (400 MHz,  $\text{CDCl}_3$ )  $\delta$  8.10 (d,  $J = 7.8$  Hz, 2H), 7.59 (dd,  $J = 7.9$  Hz,  $J = 1.0$  Hz, 1H), 7.44 (t,  $J = 8.0$  Hz, 2H), 7.43 – 7.38 (m, 2H), 7.07 – 7.02 (m, 2H), 4.06 (d,  $J = 6.4$  Hz, 2H), 1.84 – 1.75 (m, 2H), 0.86 (t,  $J = 7.4$  Hz, 3H);  $^{13}\text{C}$  NMR (100 MHz,  $\text{CDCl}_3$ )  $\delta$  ppm 151.7, 144.7, 131.3, 129.9, 129.1, 125.5, 124.7, 120.8, 114.6, 71.2, 22.8, 10.8; HR-MS (ESI) ( $[\text{M}+\text{H}]^+$ ) Calcd. for  $\text{C}_{15}\text{H}_{17}\text{N}_2\text{O}_2^+$ : 257.1285, found: 257.1289.



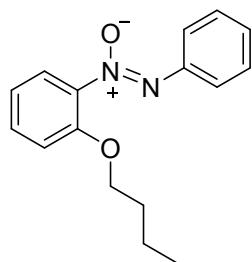

**(4d) (Z)-1-(2-butoxyphenyl)-2-phenyldiazene oxide:** light yellow solid; m.p.73.4-74.7°C  $^1\text{H}$  NMR (400 MHz,  $\text{CDCl}_3$ )  $\delta$  8.04 (d,  $J = 7.9$  Hz, 2H), 7.54 (dd,  $J = 7.9$  Hz,  $J = 1.2$  Hz, 1H), 7.44 (t,  $J = 8.0$  Hz, 2H), 7.39 - 7.33 (m, 2H), 7.00 - 6.97 (m, 2H), 4.05 (d,  $J = 5.4$  Hz, 2H), 1.74 - 1.67 (m, 2H), 1.43 - 1.37 (m, 2H), 0.86 (t,  $J = 6.8$  Hz, 3H);  $^{13}\text{C}$  NMR (100 MHz,  $\text{CDCl}_3$ )  $\delta$  ppm 151.7, 144.6, 131.3, 129.9, 129.1, 125.5, 124.7, 120.8, 114.6, 69.7, 31.4, 19.4, 14.1; HR-MS (ESI) ( $[\text{M}+\text{H}]^+$ ) Calcd. for  $\text{C}_{16}\text{H}_{19}\text{N}_2\text{O}_2^+$ : 271.1141, found: 271.1144.

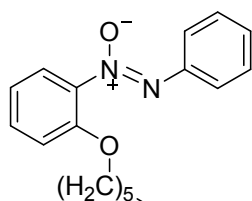

**(4e) (Z)-1-(2-(hexyloxy)phenyl)-2-phenyldiazene oxide:** light yellow liquid;  $^1\text{H}$  NMR (400 MHz,  $\text{CDCl}_3$ )  $\delta$  8.04 (d,  $J = 7.7$  Hz, 2H), 7.55 (d,  $J = 6.2$  Hz, 1H), 7.44 (t,  $J = 8.0$  Hz, 2H), 7.38 - 7.33 (m, 2H), 7.00 - 6.97 (m, 2H), 4.04 (t,  $J = 5.8$  Hz, 2H), 1.75 - 1.68 (m, 2H), 1.40 - 1.35 (m, 2H), 1.21 - 1.96 (m, 4H), 0.79 (t,  $J = 7.1$  Hz, 3H);  $^{13}\text{C}$  NMR (100 MHz,  $\text{CDCl}_3$ )  $\delta$  ppm 151.7, 144.6, 131.3, 129.9, 129.0, 125.5, 124.7, 120.8, 114.6, 69.8, 31.8, 29.4, 25.9, 22.9, 14.3; HR-MS (ESI) ( $[\text{M}+\text{H}]^+$ ) Calcd. for  $\text{C}_{18}\text{H}_{23}\text{N}_2\text{O}_2^+$ : 299.1754, found: 299.1757.

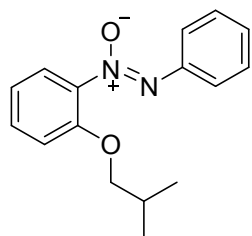

**(4f) (Z)-1-(2-isobutoxyphenyl)-2-phenyldiazene oxide:** light yellow liquid;  $^1\text{H}$  NMR (400 MHz,  $\text{CDCl}_3$ )  $\delta$  8.05 (d,  $J = 7.8$  Hz, 2H), 7.55 (dd,  $J = 7.9$  Hz,  $J = 1.2$  Hz, 1H), 7.44 (t,  $J = 8.2$  Hz, 2H), 7.38 - 7.33 (m, 2H), 7.02 - 6.96 (m, 2H), 3.81 (d,  $J = 6.4$  Hz, 2H), 2.07 - 2.02 (m, 1H), 0.93 (d,  $J = 6.6$  Hz, 6H);  $^{13}\text{C}$  NMR (100 MHz,  $\text{CDCl}_3$ )  $\delta$  ppm 151.7, 144.6, 131.3, 129.8, 129.1, 125.5, 124.7, 120.7, 114.4, 75.8, 28.6, 19.5; HR-MS (ESI) ( $[\text{M}+\text{H}]^+$ ) Calcd. for  $\text{C}_{16}\text{H}_{19}\text{N}_2\text{O}_2^+$ : 271.1141, found: 271.1146.

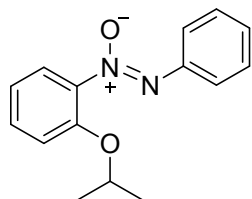

**(4g) (Z)-1-(2-isopropoxyphenyl)-2-phenyldiazene oxide:** light yellow liquid;  $^1\text{H}$  NMR (400 MHz,  $\text{CDCl}_3$ )  $\delta$  8.08 (d,  $J = 8.0$  Hz, 2H), 7.56 (d,  $J = 3.8$  Hz, 1H), 7.48 (t,  $J = 7.0$  Hz, 2H), 7.40 (t,  $J = 7.2$  Hz, 2H), 7.07 (d,  $J = 9.6$  Hz, 1H), 7.02 (d,  $J = 6.1$  Hz, 1H), 4.67 - 4.58 (m, 1H), 1.34 (d,  $J$

= 6.0 Hz, 6H);  $^{13}\text{C}$  NMR (100 MHz,  $\text{CDCl}_3$ )  $\delta$  ppm 150.7, 144.7, 131.2, 129.1, 125.7, 124.8, 121.0, 116.6, 72.9, 22.5; HR-MS (ESI) ( $[\text{M}+\text{H}]^+$ ) Calcd. for  $\text{C}_{15}\text{H}_{17}\text{N}_2\text{O}_2^+$ : 257.1285, found: 257.1287.

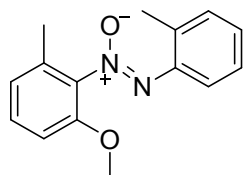

**(4h) (Z)-1-(2,4-dimethoxyphenyl)-2-(4-methoxyphenyl)diazene oxide:** light yellow liquid;  $^1\text{H}$  NMR (400 MHz,  $\text{CDCl}_3$ )  $\delta$  8.26 (d,  $J = 9.1$  Hz, 2H), 7.54 (d,  $J = 8.7$  Hz, 1H), 6.96 (d,  $J = 9.1$  Hz, 2H), 6.56 (d,  $J = 2.4$  Hz, 1H), 6.53 – 6.50 (m, 1H), 3.88 (s, 3H), 3.87 (s, 3H), 3.85 (s, 3H);  $^{13}\text{C}$  NMR (100 MHz,  $\text{CDCl}_3$ )  $\delta$  ppm 162.0, 160.7, 153.6, 138.7, 128.1, 126.0, 114.0, 104.6, 100.4, 56.7, 56.1, 55.9; HR-MS (ESI) ( $[\text{M}+\text{H}]^+$ ) Calcd. for  $\text{C}_{15}\text{H}_{17}\text{N}_2\text{O}_2^+$ : 257.1285, found: 257.1289.

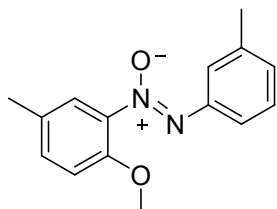

**(4i) (Z)-1-(2-methoxy-6-methylphenyl)-2-(o-tolyl)diazene oxide:** light yellow liquid;  $^1\text{H}$  NMR (400 MHz,  $\text{CDCl}_3$ )  $\delta$  7.86 (d,  $J = 7.5$  Hz, 1H), 7.34 – 7.27 (m, 4H), 6.91 (d,  $J = 8.0$  Hz, 2H), 3.90 (s, 3H), 2.43 (s, 3H), 2.39 (s, 3H);  $^{13}\text{C}$  NMR (100 MHz,  $\text{CDCl}_3$ )  $\delta$  ppm 148.6, 143.2, 137.5, 130.4, 129.5, 129.3, 127.5, 124.8, 123.8, 121.4, 112.1, 55.5, 20.5, 19.3; HR-MS (ESI) ( $[\text{M}+\text{Na}]^+$ ) Calcd. for  $\text{C}_{15}\text{H}_{16}\text{N}_2\text{O}_2\text{Na}^+$ : 279.1104, found: 279.1108.

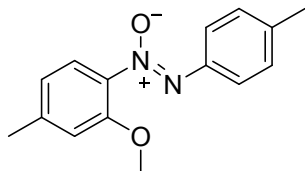

**(4j) (Z)-1-(2-methoxy-4-methylphenyl)-2-(p-tolyl)diazene oxide:** light yellow liquid;  $^1\text{H}$  NMR (400 MHz,  $\text{CDCl}_3$ )  $\delta$  8.09 (d,  $J = 8.4$  Hz, 2H), 7.47 (d,  $J = 7.9$  Hz, 1H), 7.27 (d,  $J = 8.1$  Hz, 2H), 6.84 (t,  $J = 8.1$  Hz, 2H), 3.89 (s, 3H), 2.41 (s, 6H);  $^{13}\text{C}$  NMR (100 MHz,  $\text{CDCl}_3$ )  $\delta$  ppm 150.6, 141.1, 140.6, 139.2, 136.8, 128.2, 124.5, 123.3, 120.0, 112.7, 55.3, 20.8, 20.6; HR-MS (ESI) ( $[\text{M}+\text{Na}]^+$ ) Calcd. for  $\text{C}_{15}\text{H}_{16}\text{N}_2\text{O}_2\text{Na}^+$ : 279.1104, found: 279.1107.

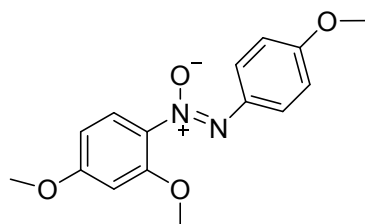

**(4k) (Z)-1-(2-ethoxy-4-methoxyphenyl)-2-(4-methoxyphenyl) diazene oxide:** light yellow liquid;  $^1\text{H}$  NMR (400 MHz,  $\text{CDCl}_3$ )  $\delta$  8.19 (d,  $J = 9.2$  Hz, 2H), 7.51 (d,  $J = 8.8$  Hz, 1H), 6.92 (d,  $J = 9.0$  Hz, 2H), 6.52 (d,  $J = 9.0$  Hz, 1H), 6.47 (dd,  $J = 8.7$  Hz,  $J = 2.2$  Hz, 1H), 4.08 (dd,  $J = 13.9$

Hz,  $J = 7.0$  Hz, 2H), 3.83 (s, 3H), 3.80 (s, 3H), 1.35 (t,  $J = 7.8$  Hz, 3H);  $^{13}\text{C}$  NMR (100 MHz,  $\text{CDCl}_3$ )  $\delta$  ppm 161.9, 160.6, 152.9, 128.0, 126.0, 114.5, 114.0, 104.8, 101.5, 65.5, 56.1, 55.9, 15.0; HR-MS (ESI) ( $[\text{M}+\text{H}]^+$ ) Calcd. for  $\text{C}_{15}\text{H}_{17}\text{N}_2\text{O}_4^+$ : 289.1183, found: 289.1185.

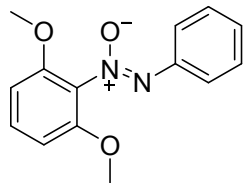

**(4) (Z)-1-(2,6dimethoxyphenyl)-2-phenyldiazene oxide:** light yellow solid; m.p. 120.8-121.6 °C;  $^1\text{H}$  NMR (400 MHz,  $\text{CDCl}_3$ )  $\delta$  8.17 (d,  $J = 7.8$  Hz, 2H), 7.49 (t,  $J = 7.6$  Hz, 2H), 7.40 (t,  $J = 7.1$  Hz, 1H), 7.32 (t,  $J = 8.4$ , 1H), 6.65 (d,  $J = 8.5$  Hz, 2H), 3.86 (s, 6H);  $^{13}\text{C}$  NMR (100 MHz,  $\text{CDCl}_3$ )  $\delta$  ppm 152.8, 144.3, 130.2, 129.8, 128.7, 125.5, 104.7, 56.4; HR-MS (ESI) ( $[\text{M}+\text{Na}]^+$ ) Calcd. for  $\text{C}_{14}\text{H}_{14}\text{N}_2\text{O}_3\text{Na}^+$ : 281.0897, found: 281.0915.

## 5. References

[1] Christin, G.; Beate, P.; Elisabeth, I.; Karola, R.-B. *Synthesis*. 2008, 1889-1894.

## 6. $^1\text{H}$ and $^{13}\text{C}$ NMR spectra of the products

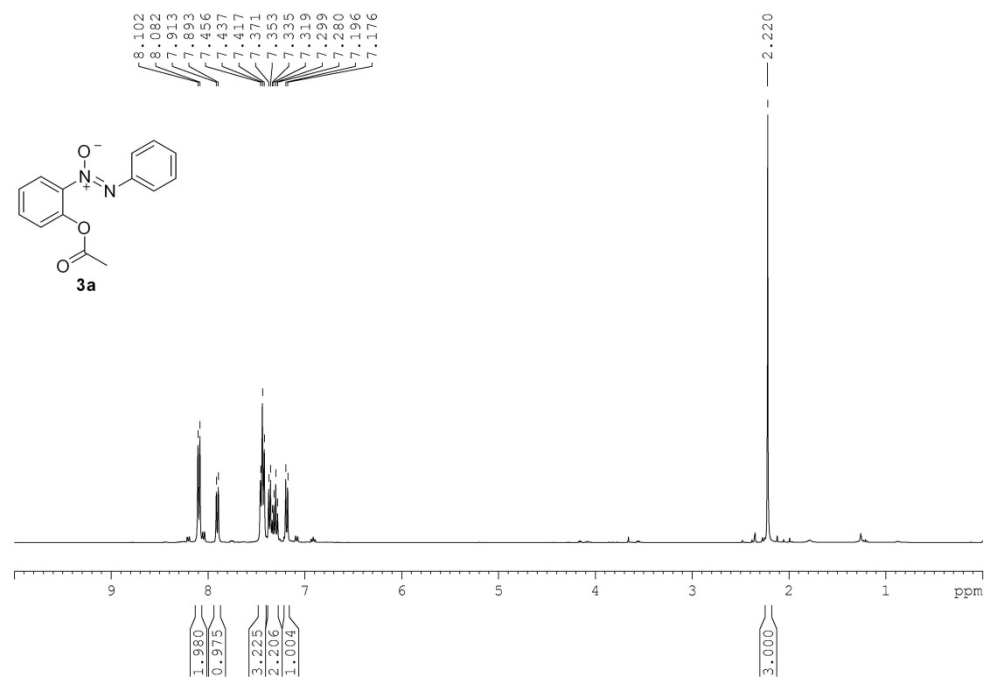

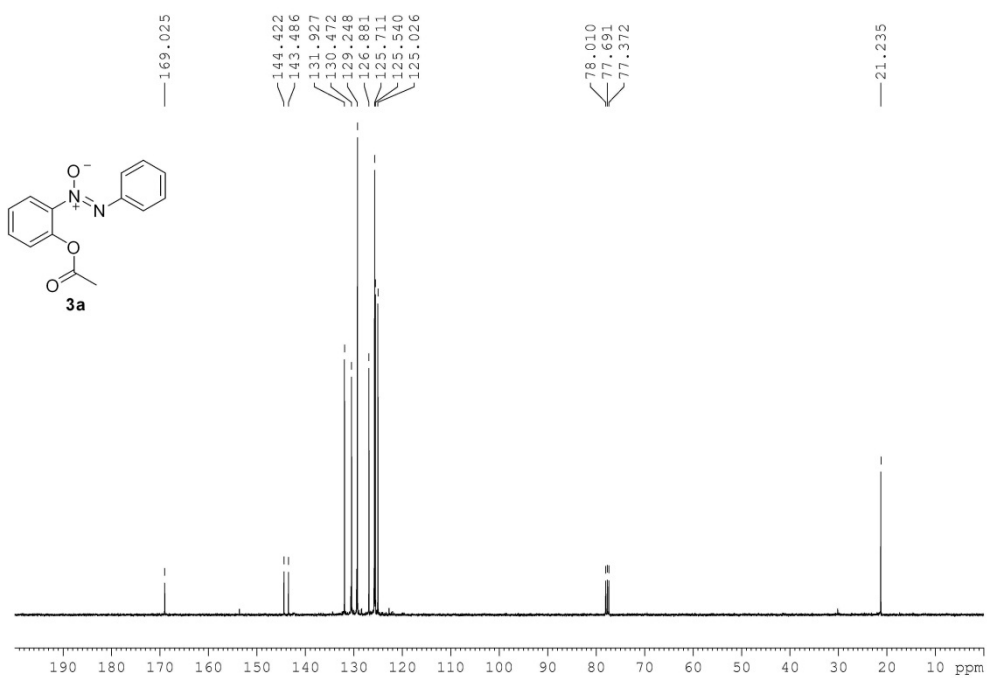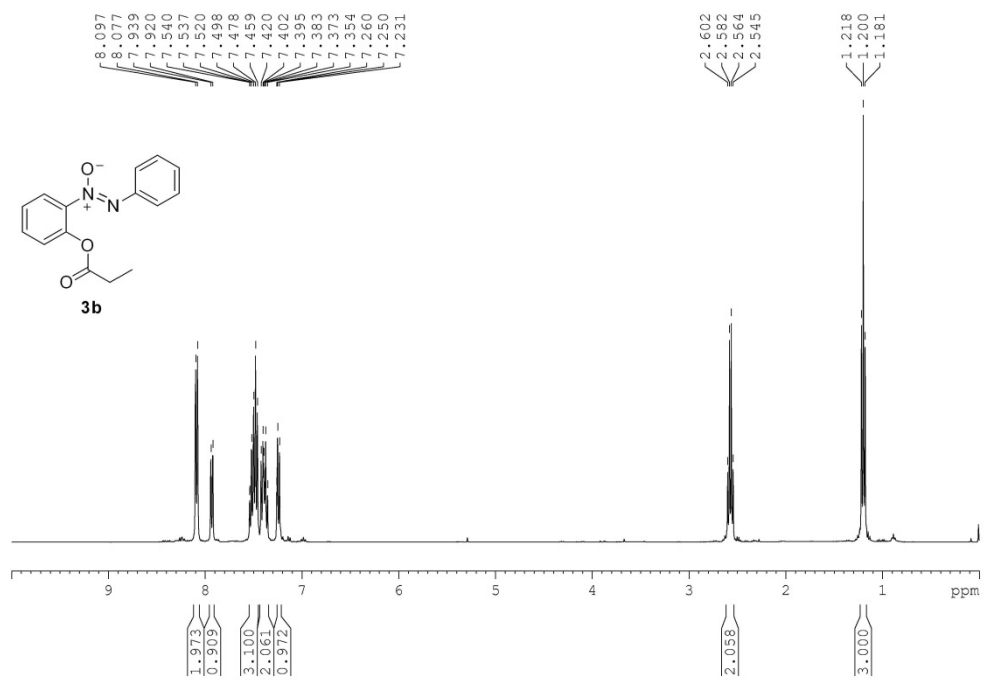

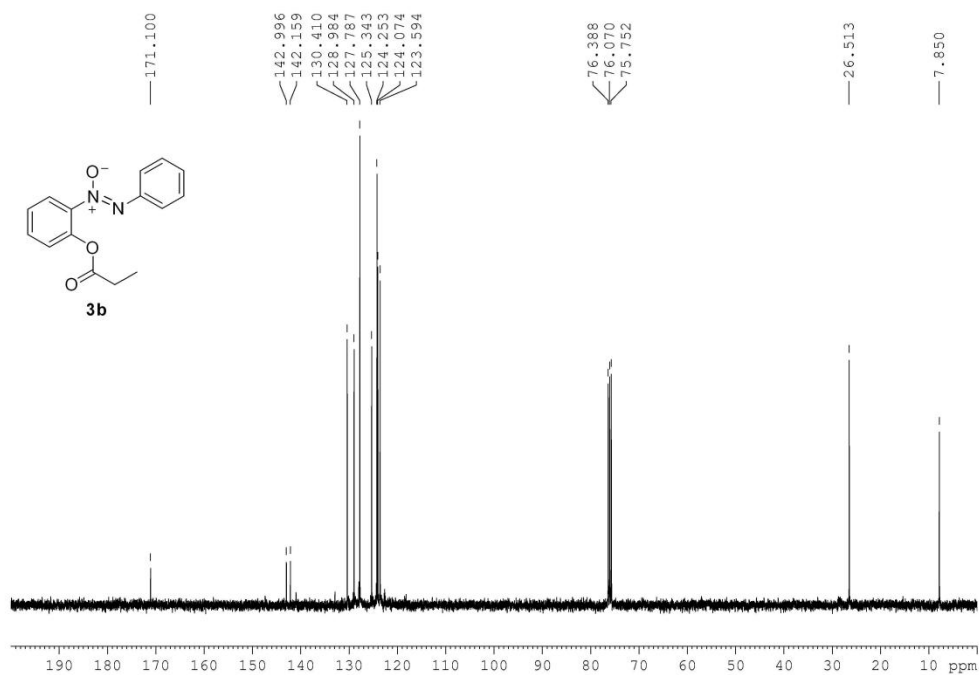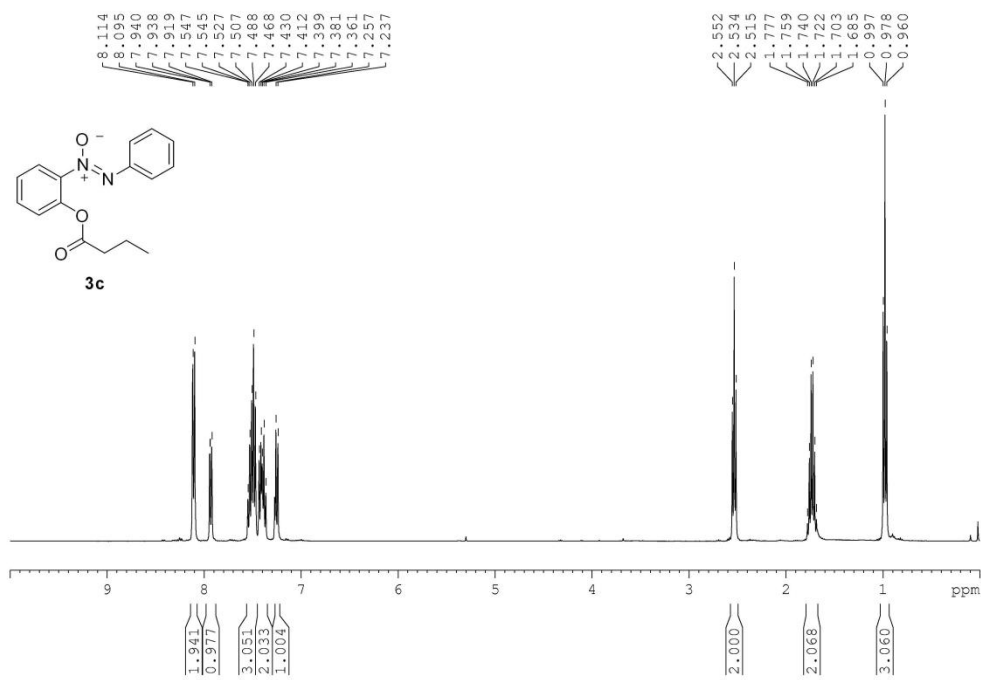

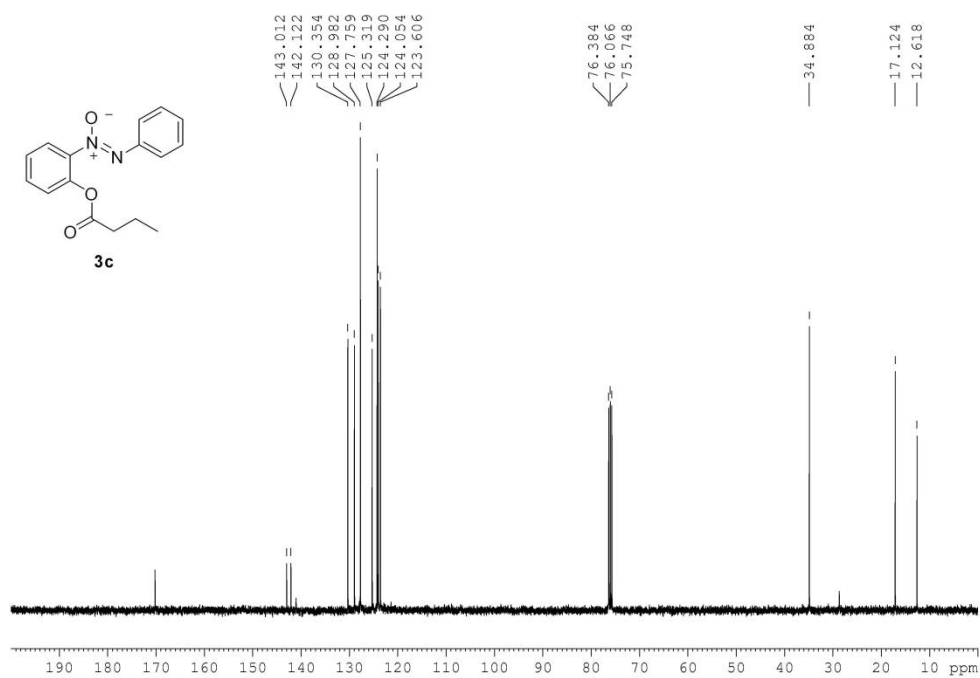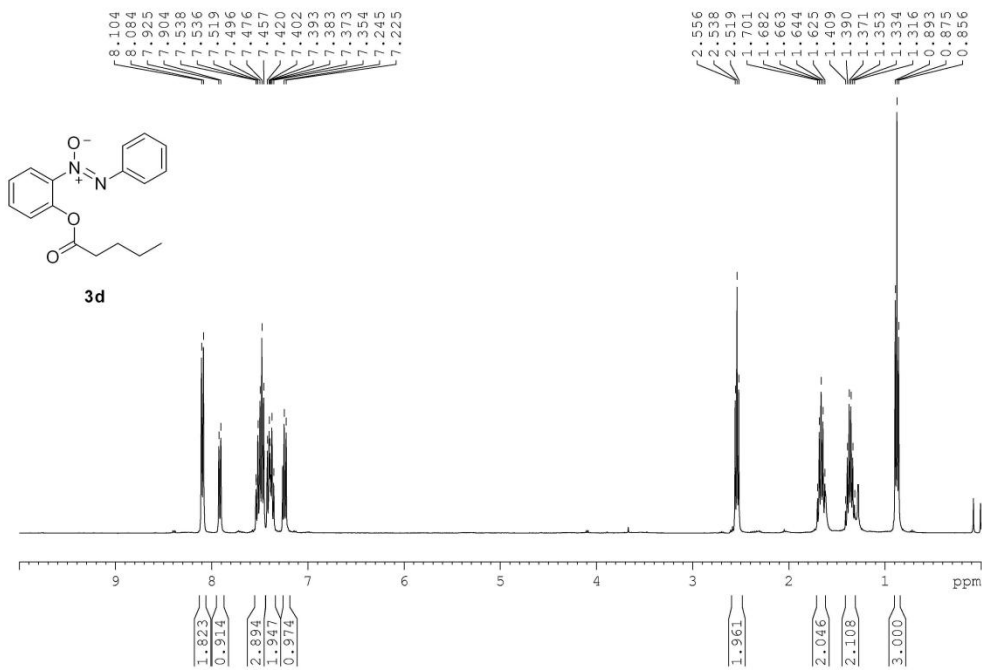

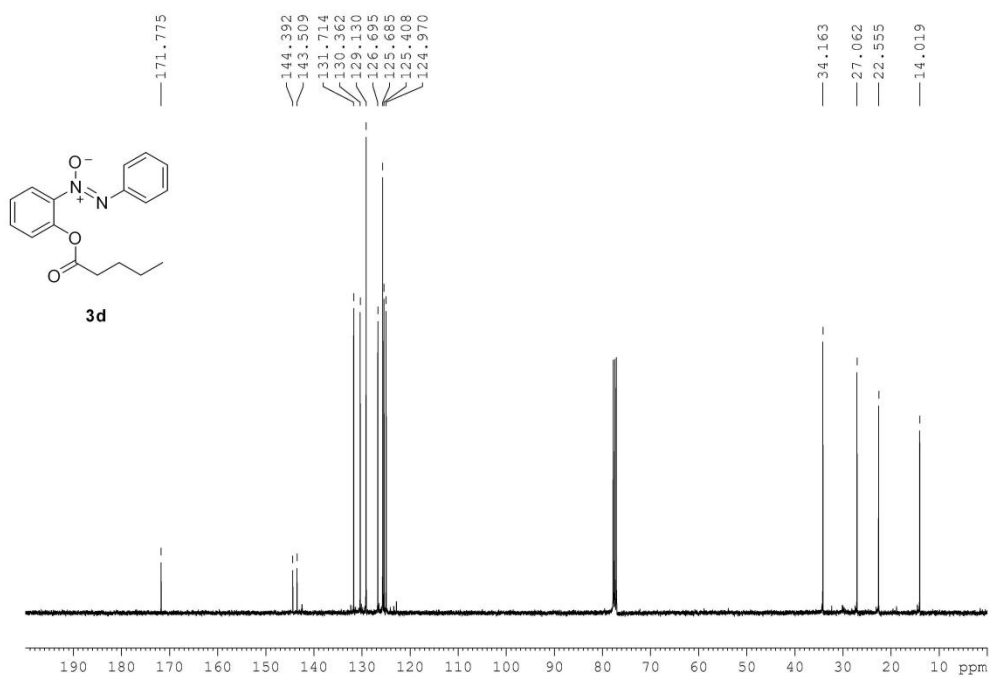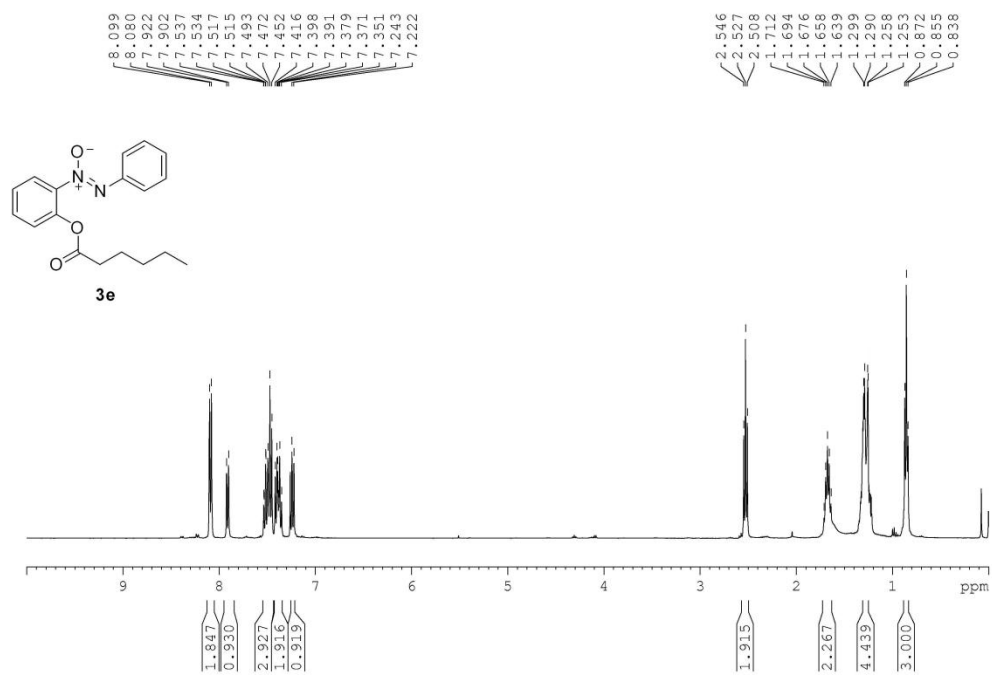

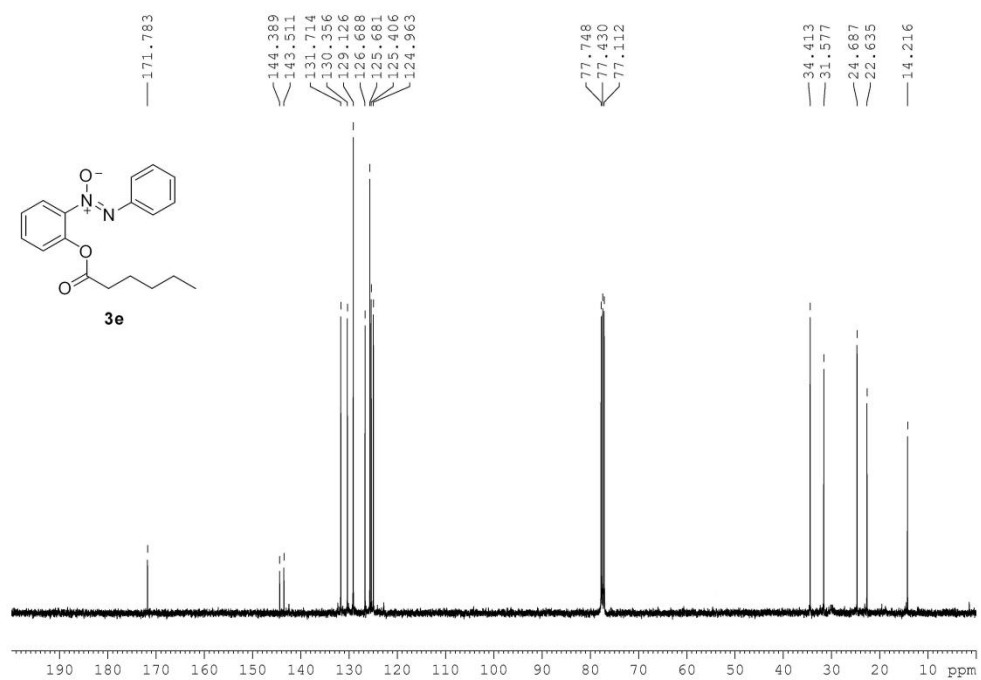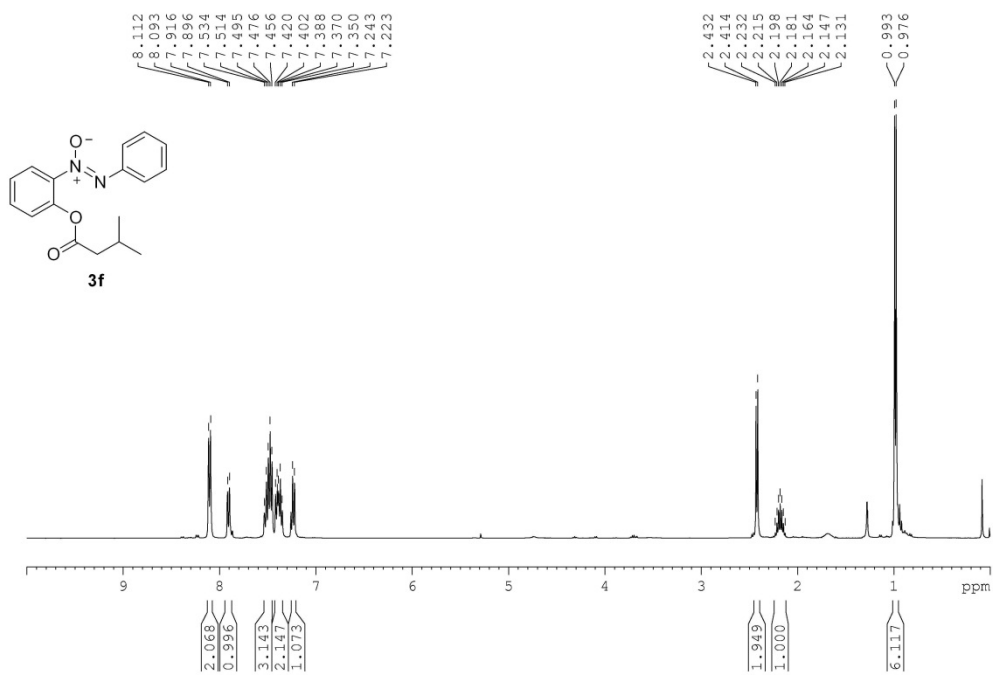



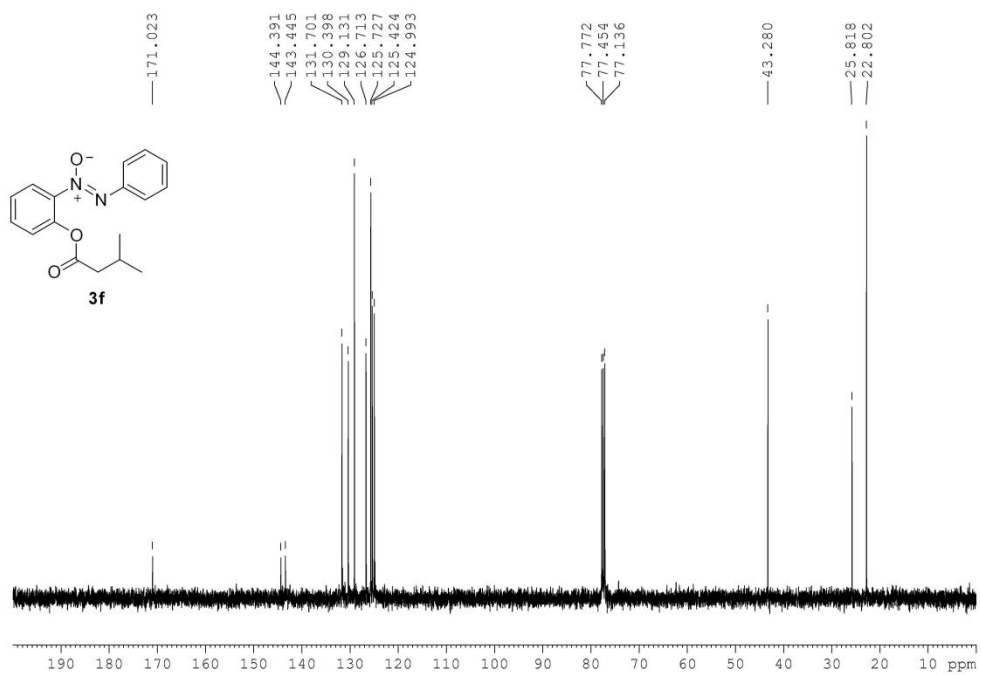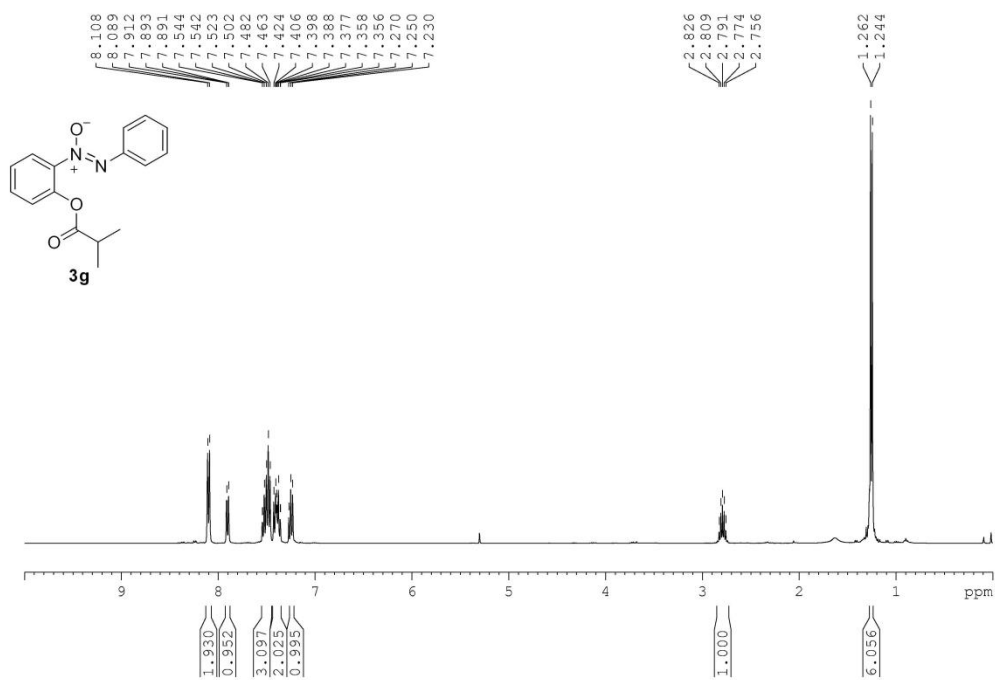

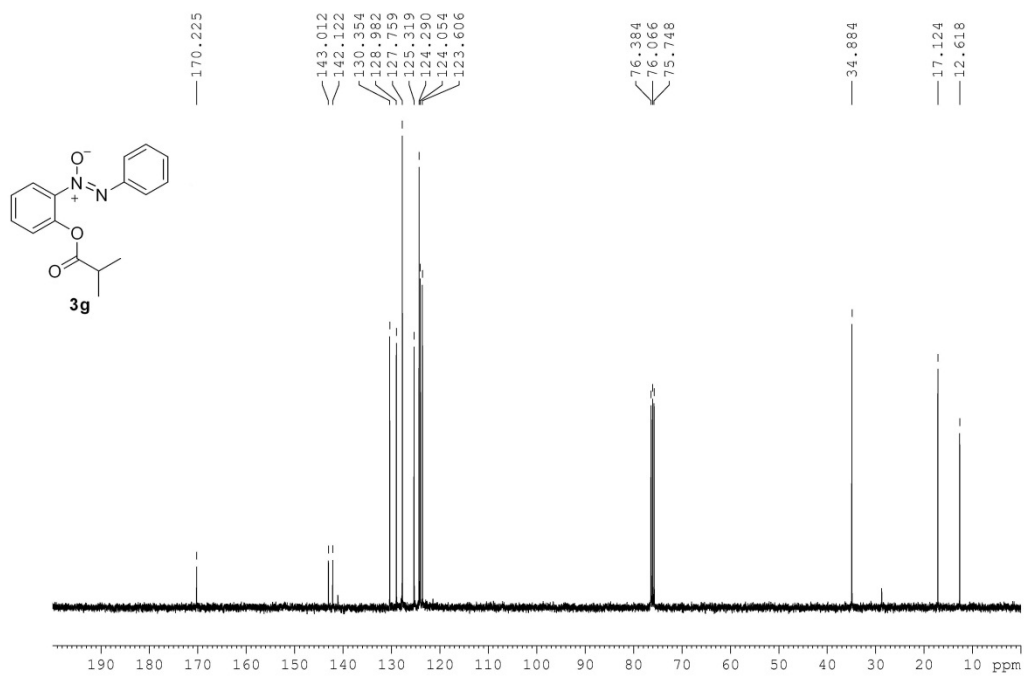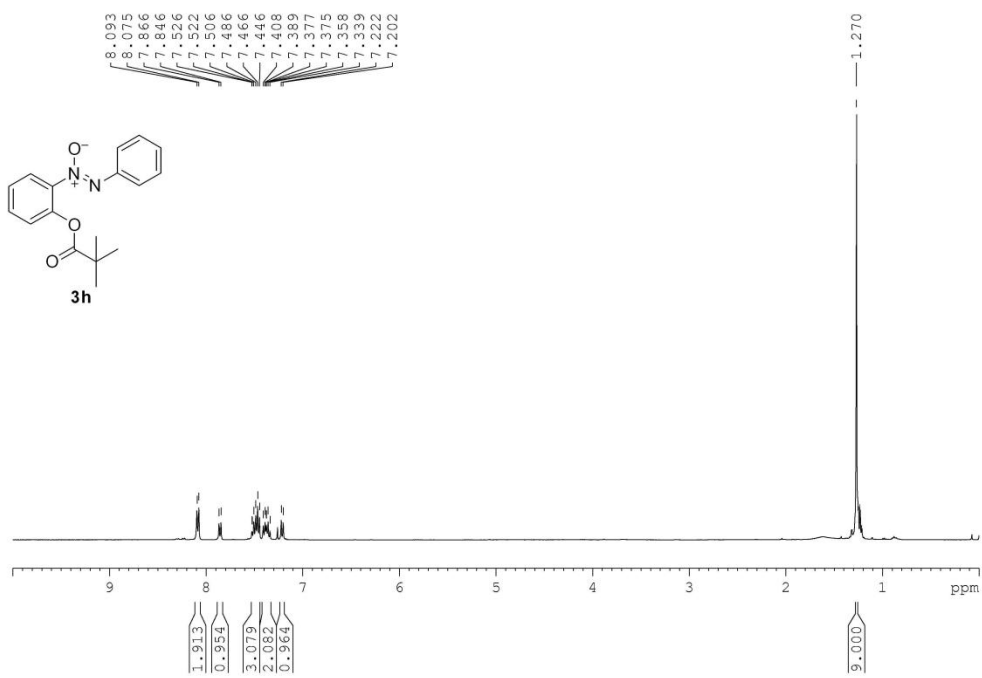

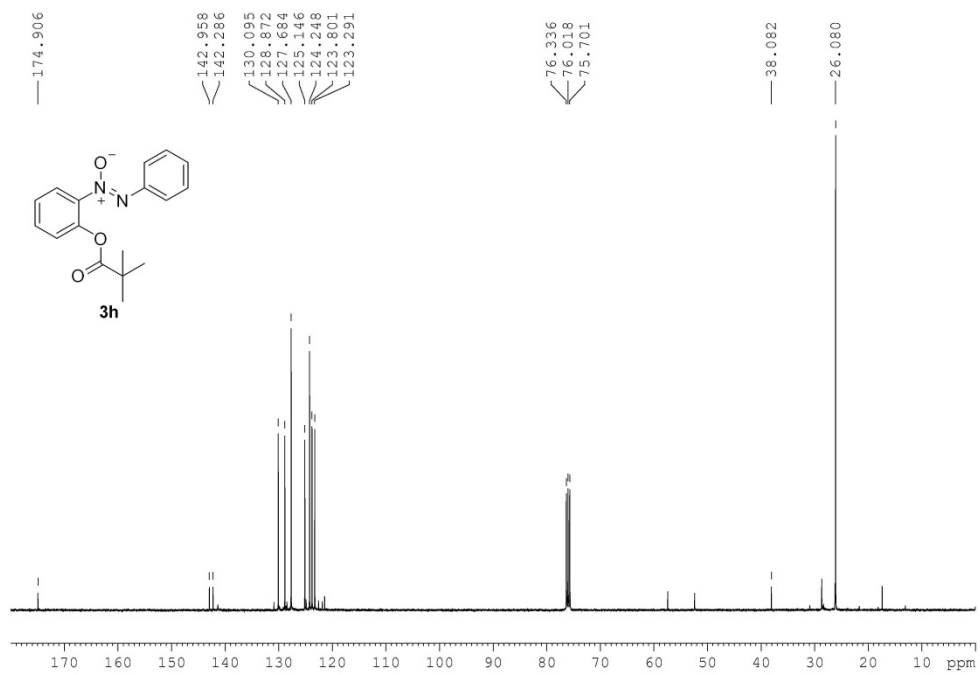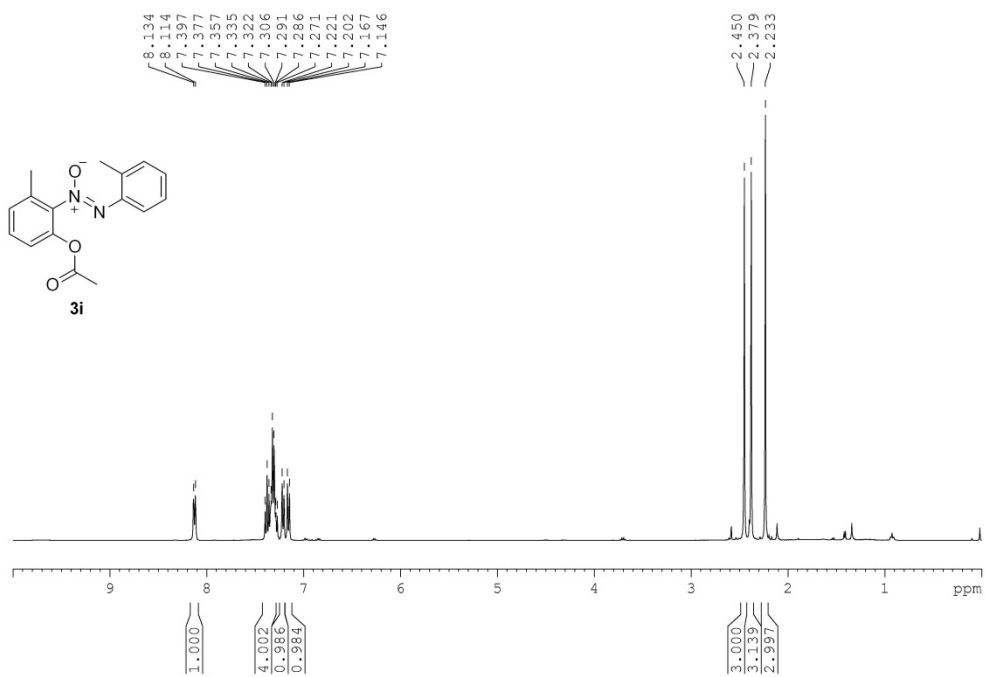

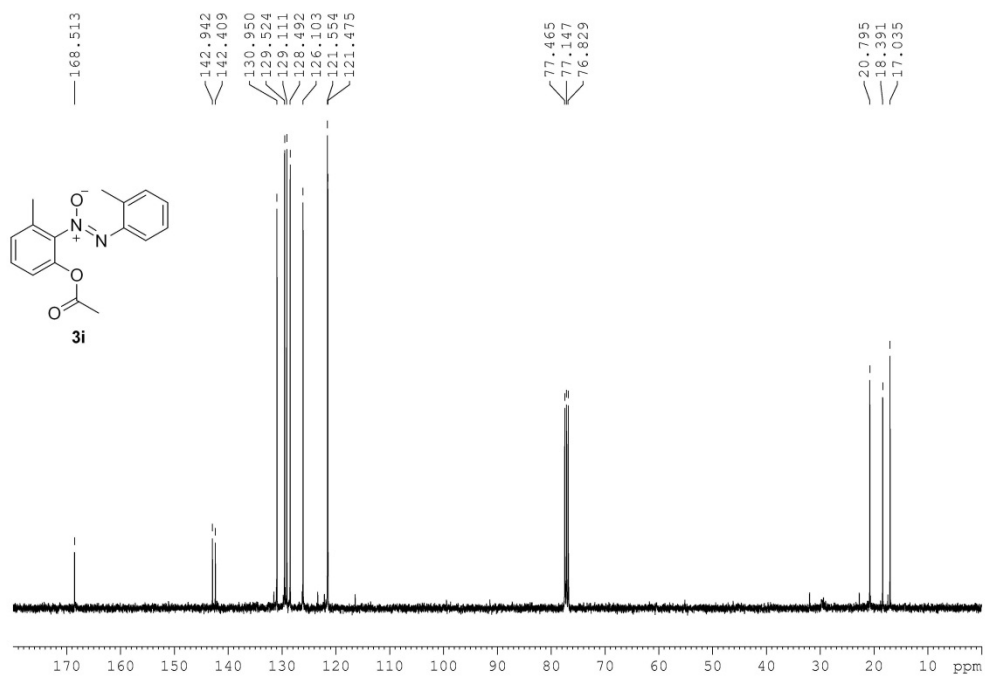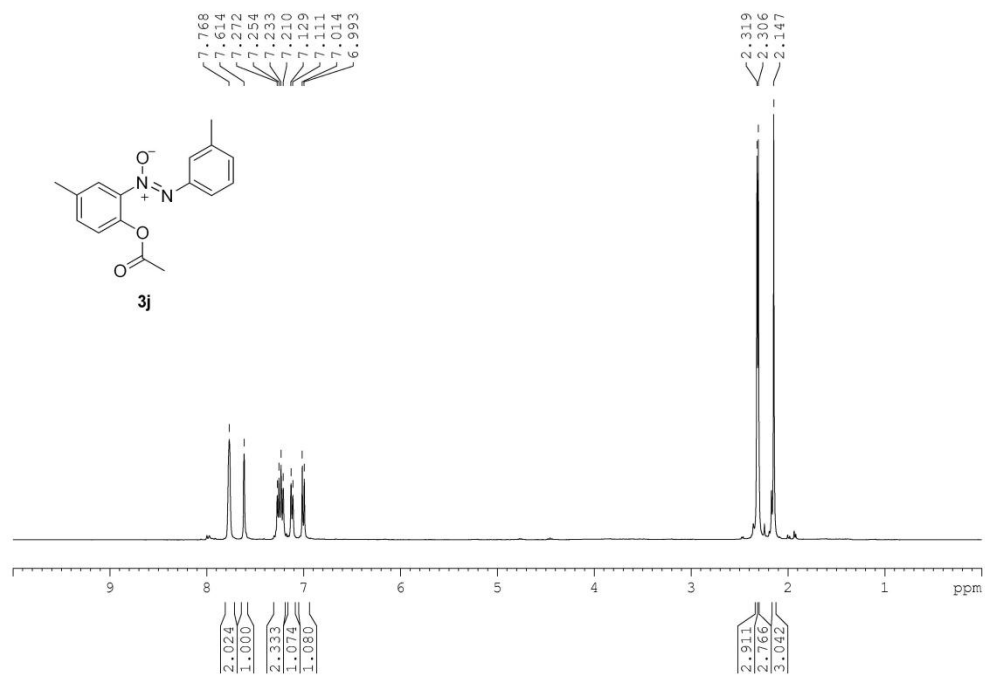

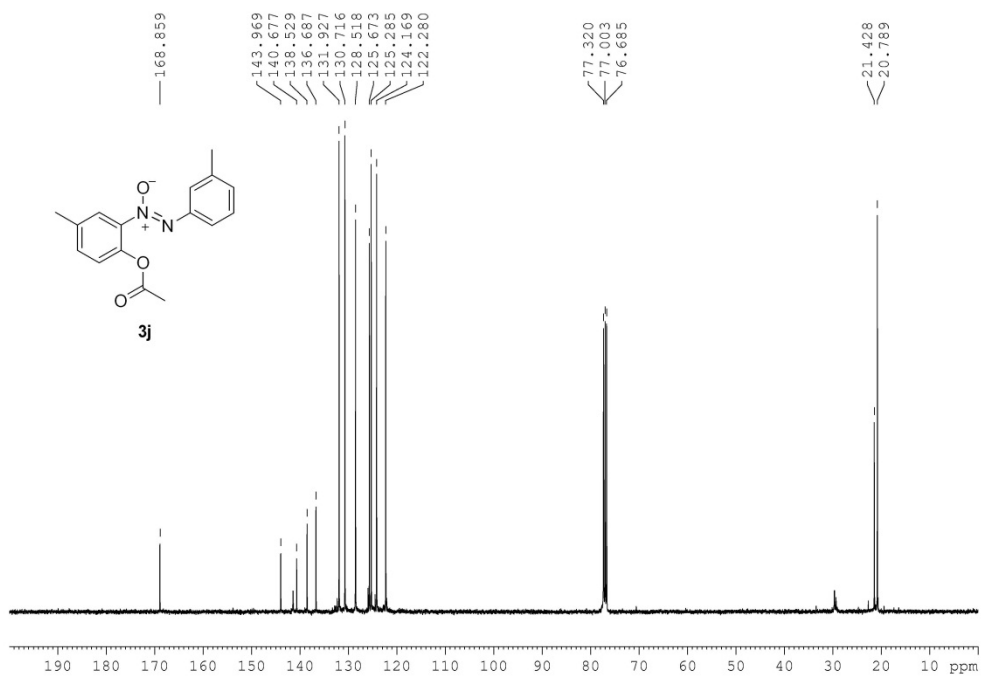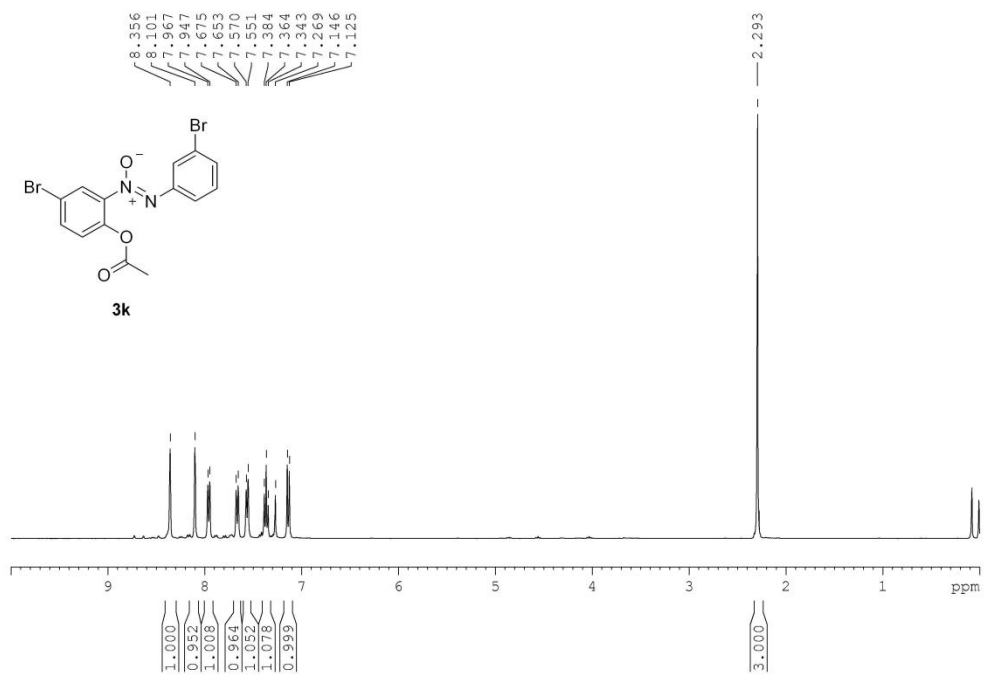

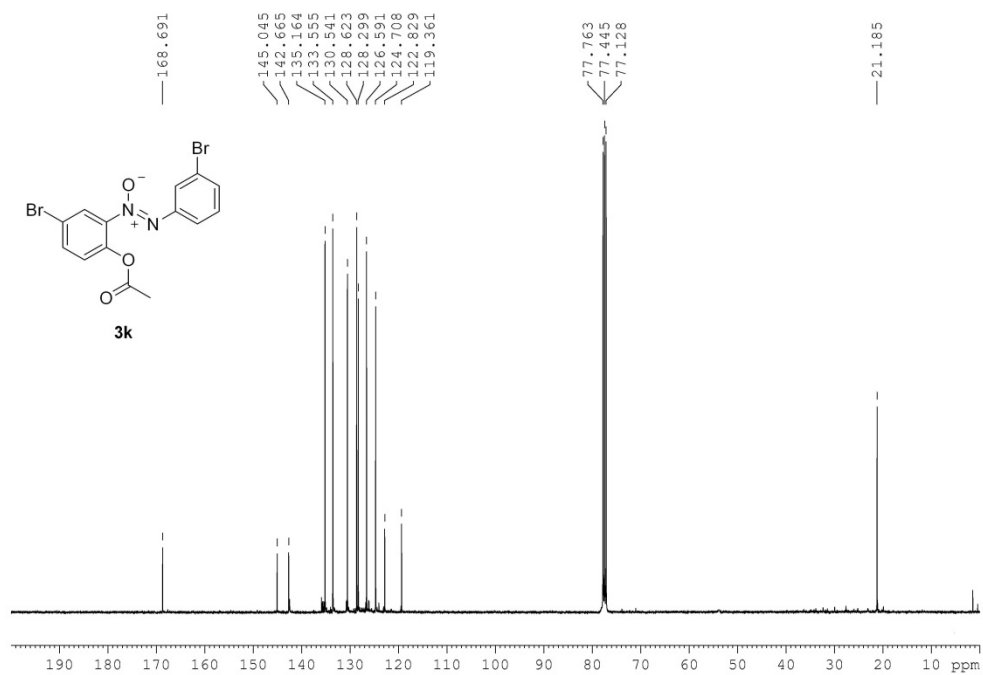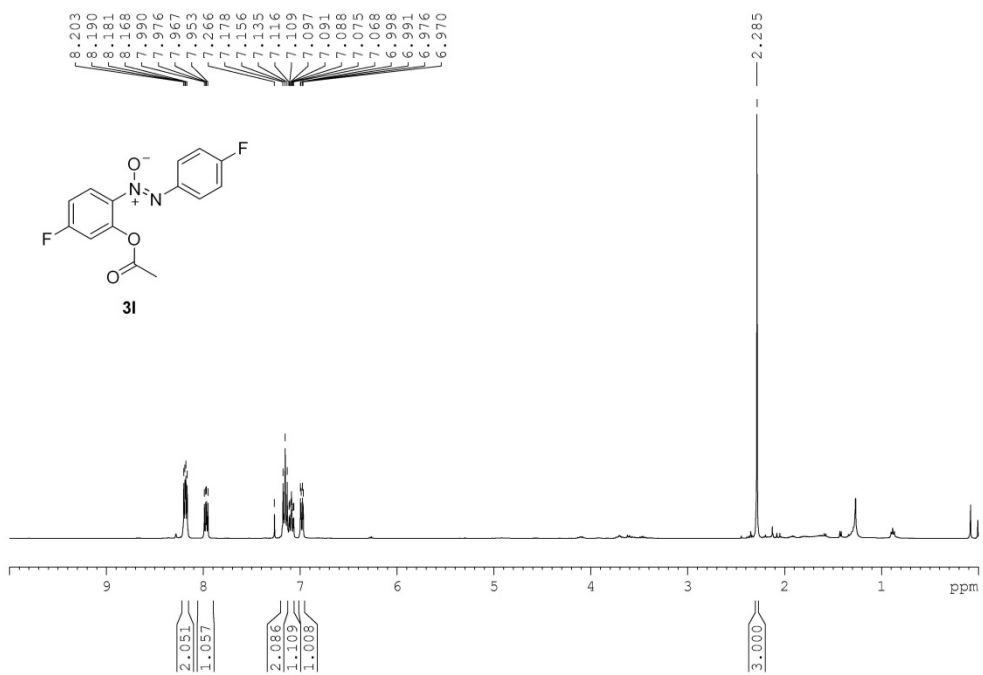

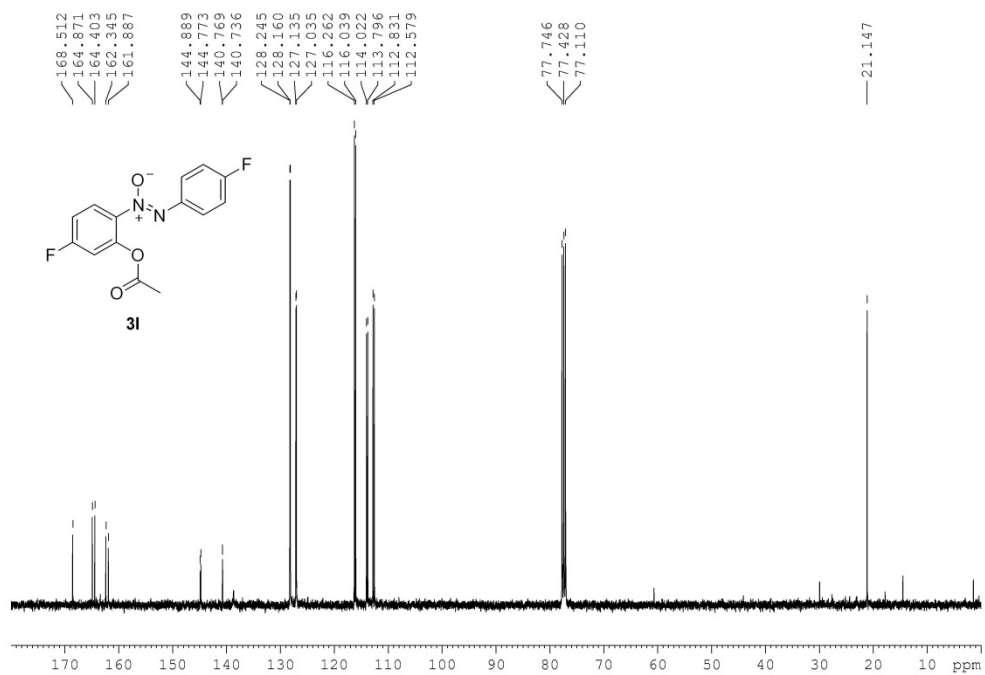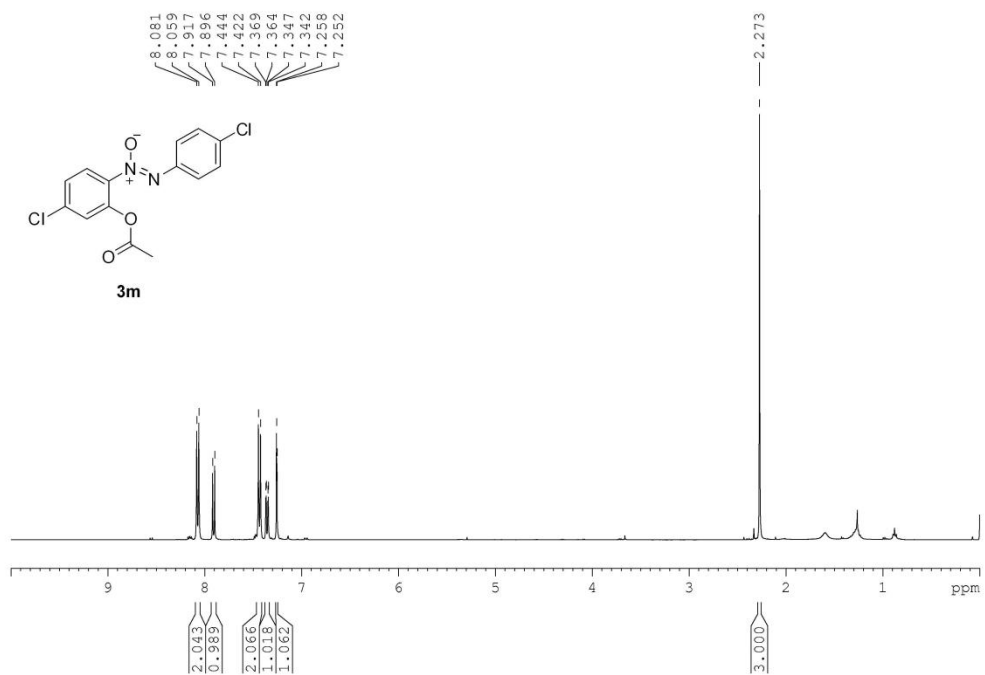

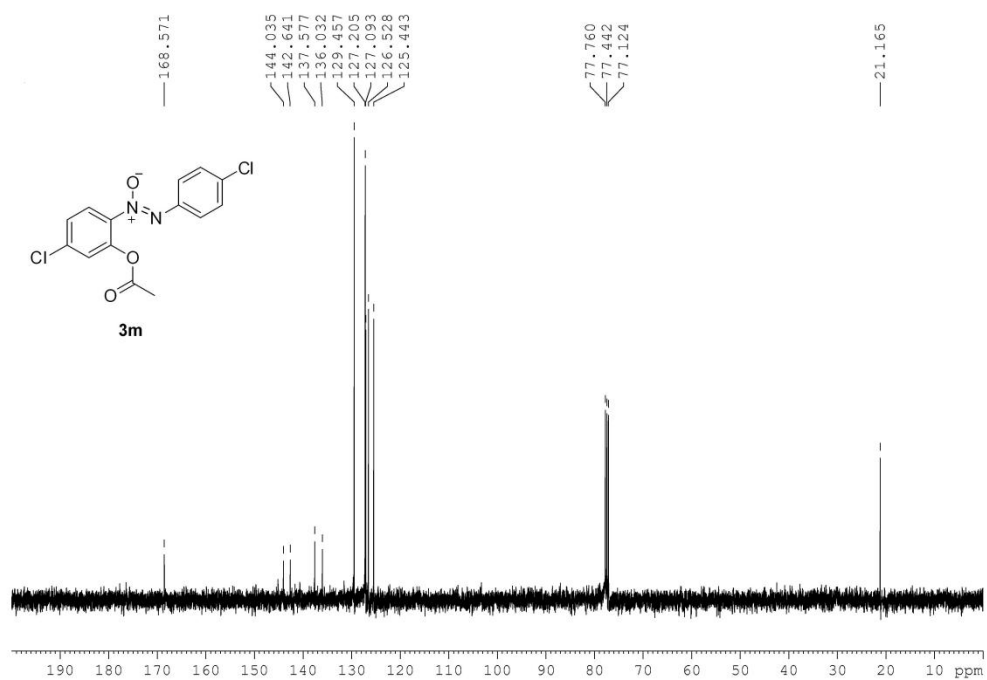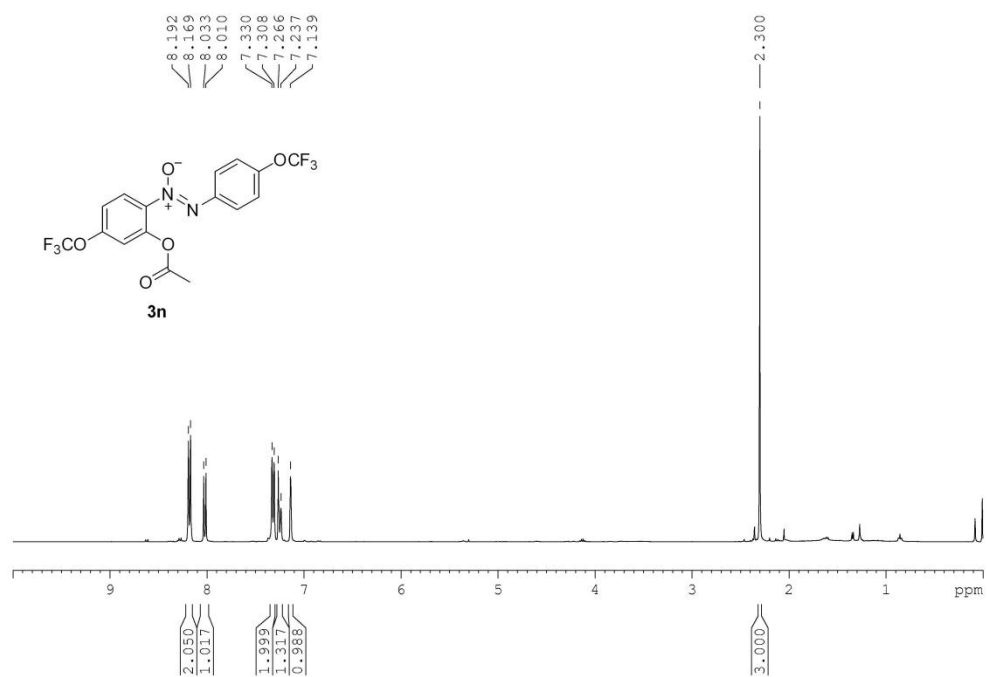



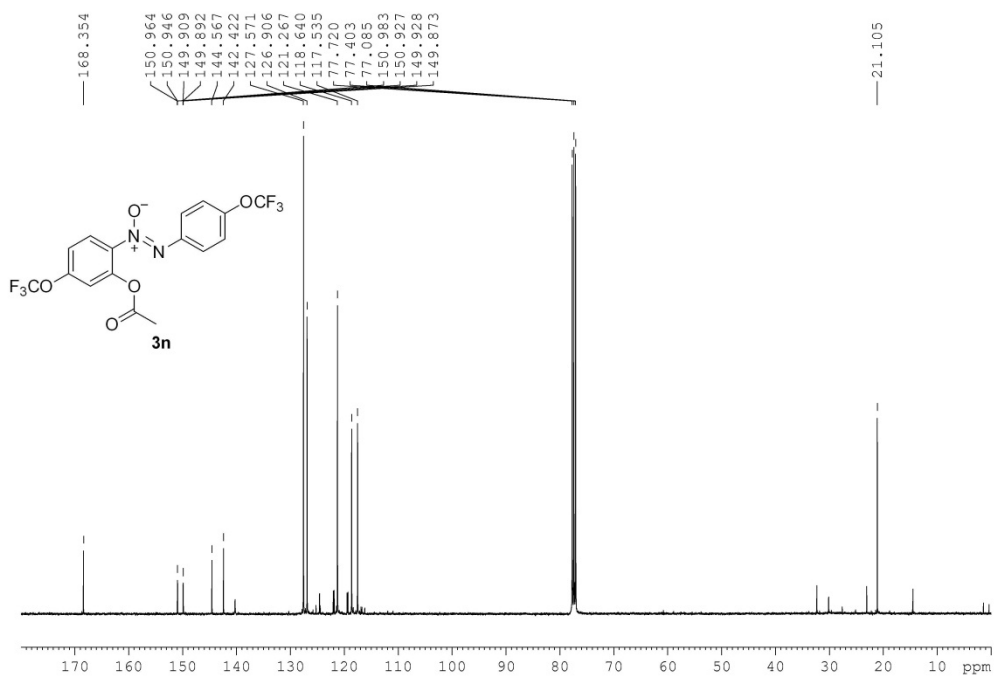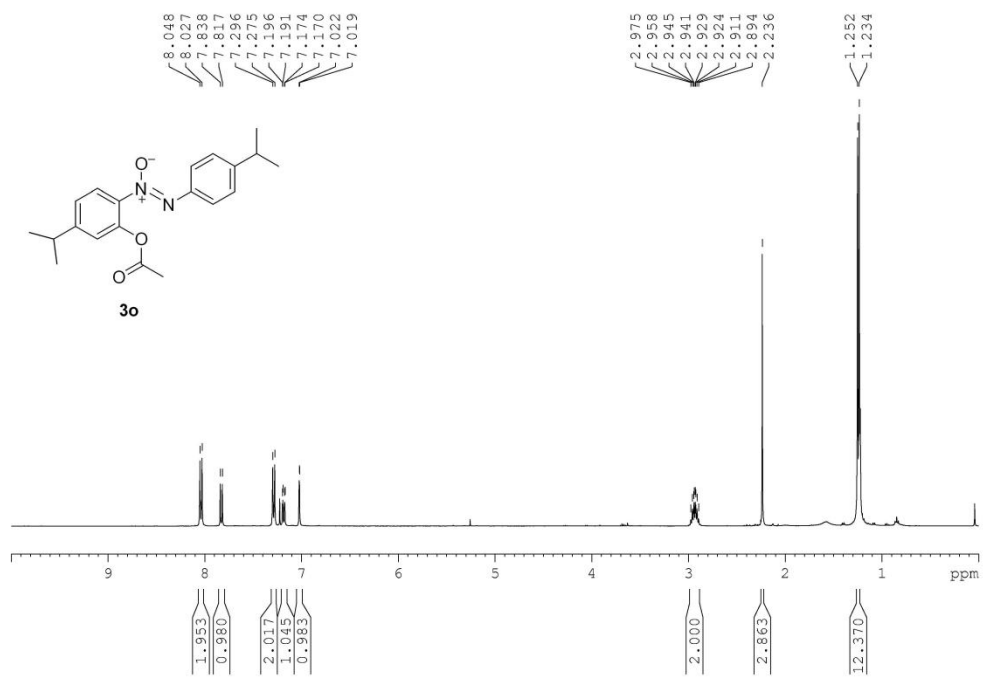

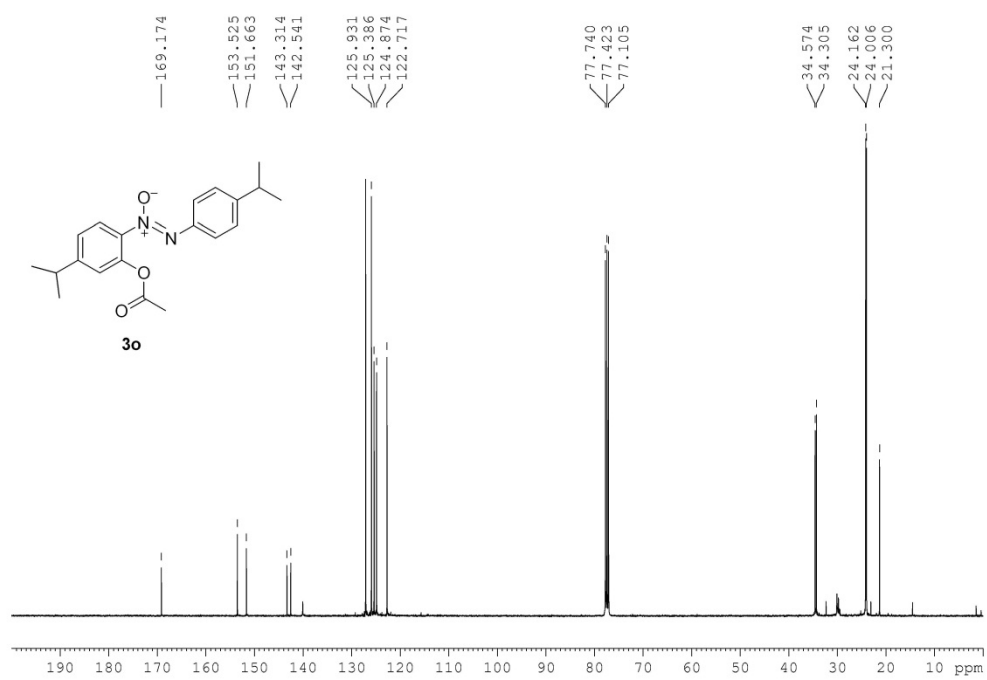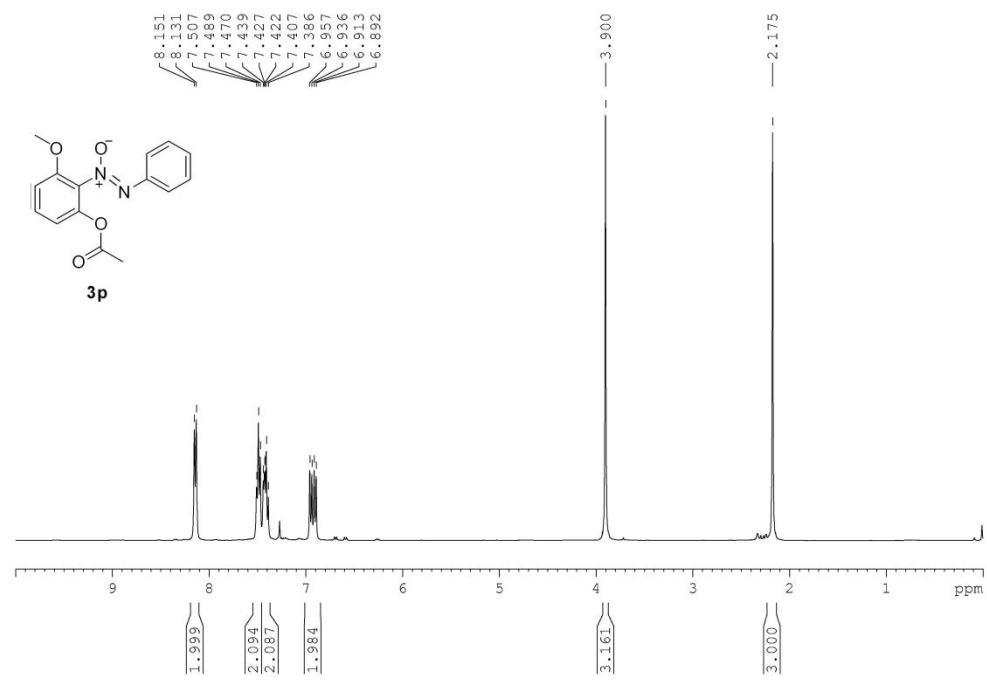

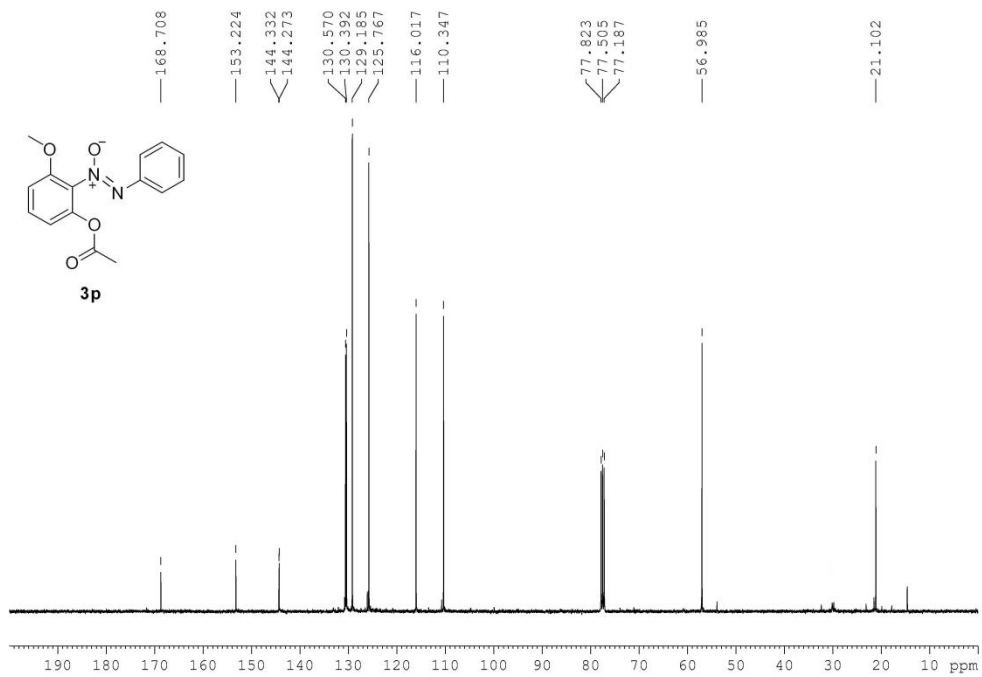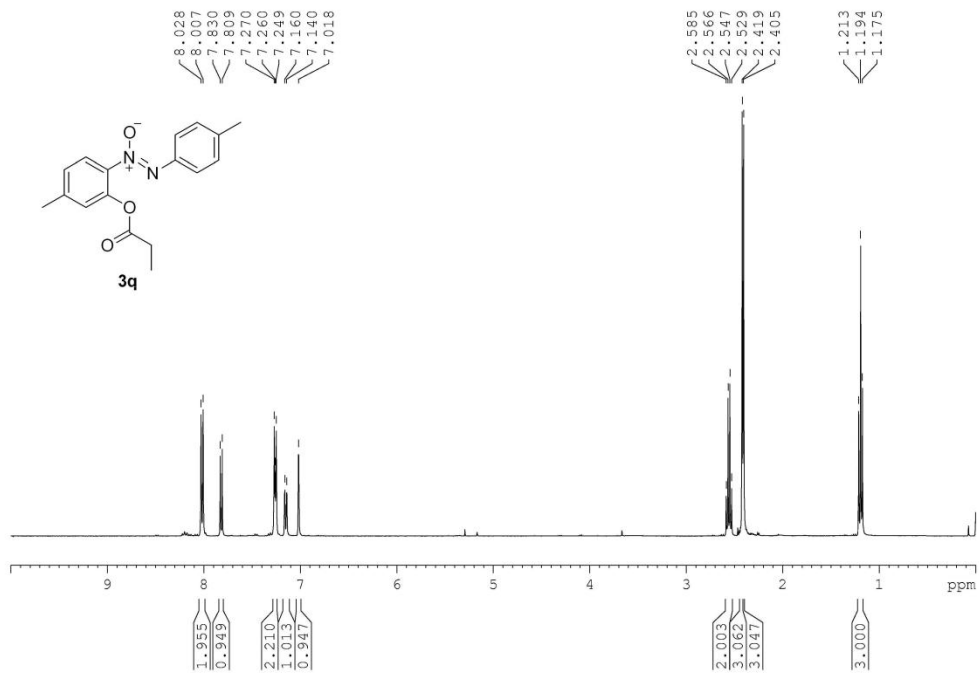

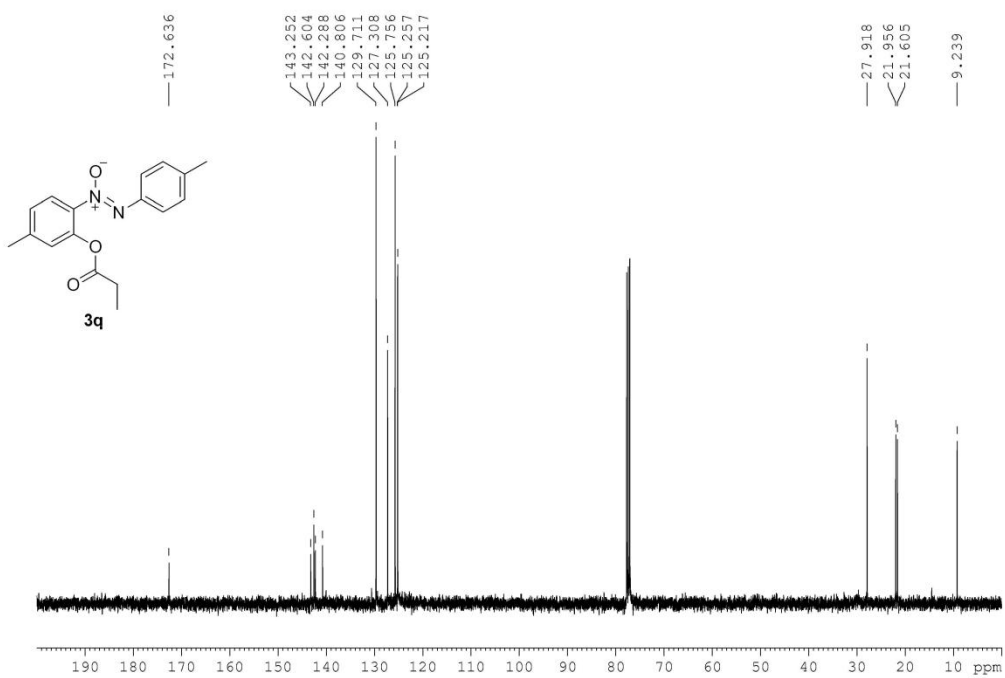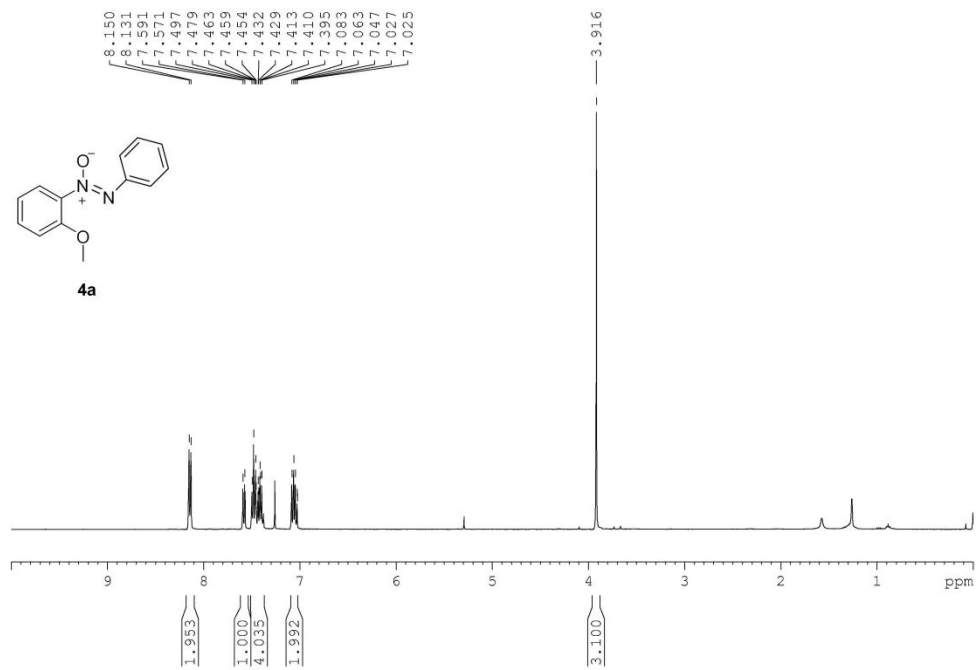

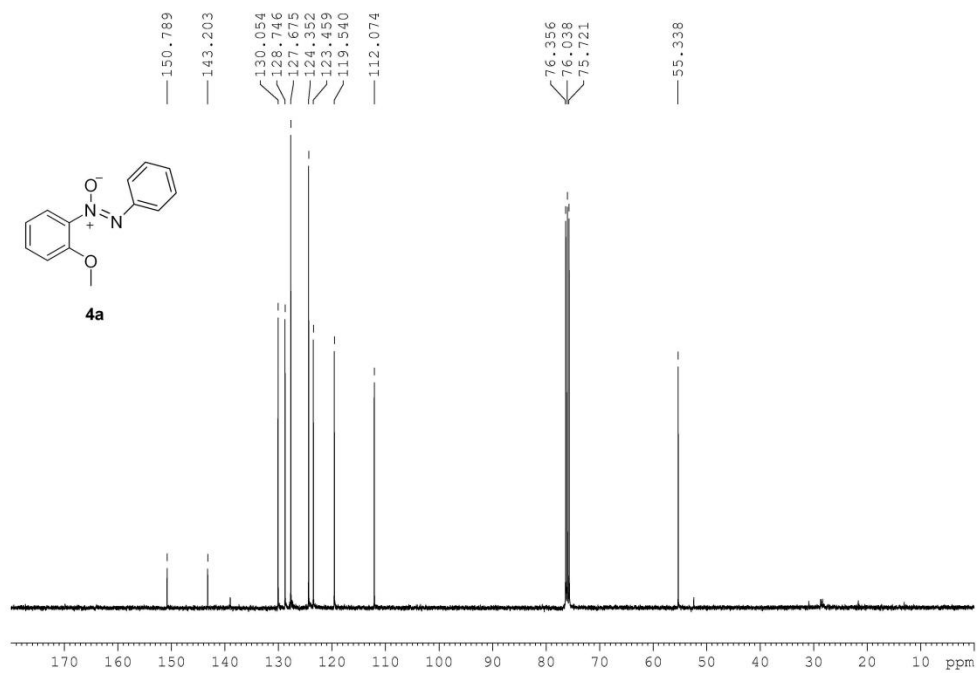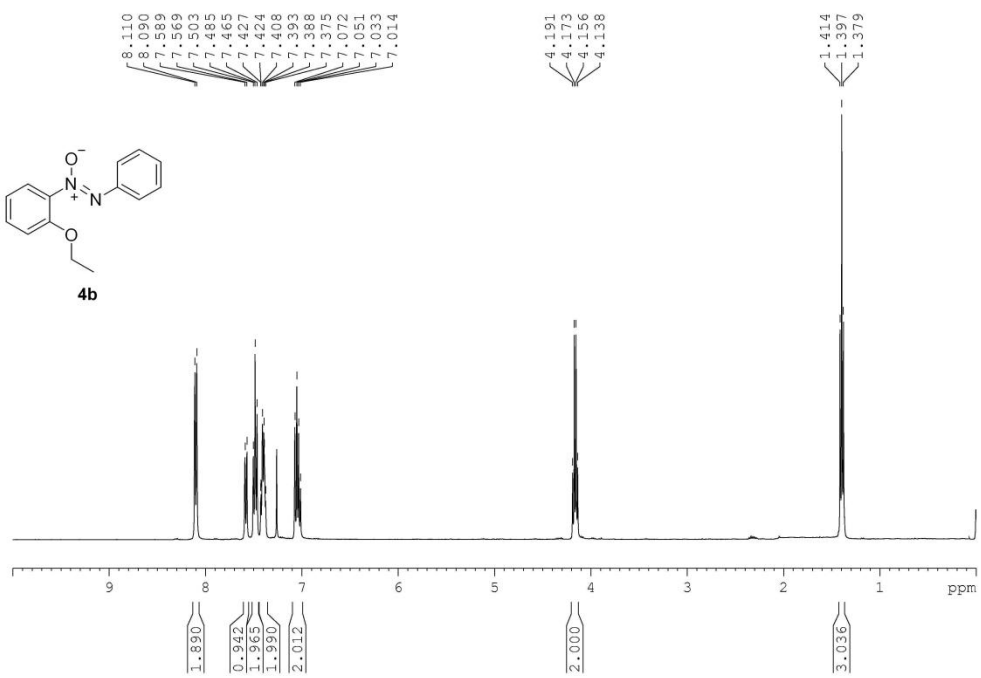

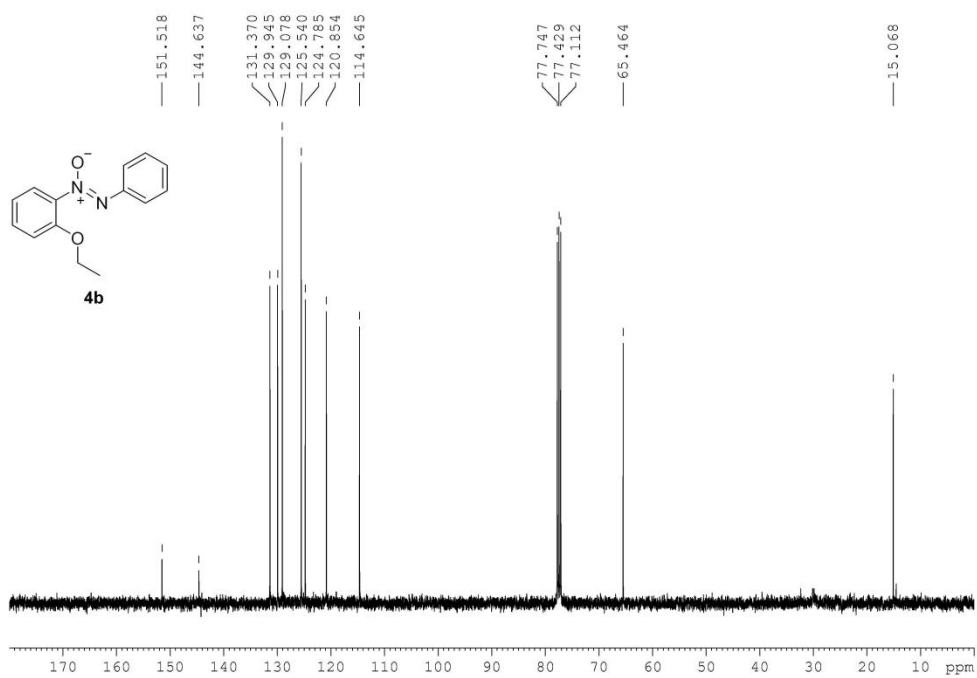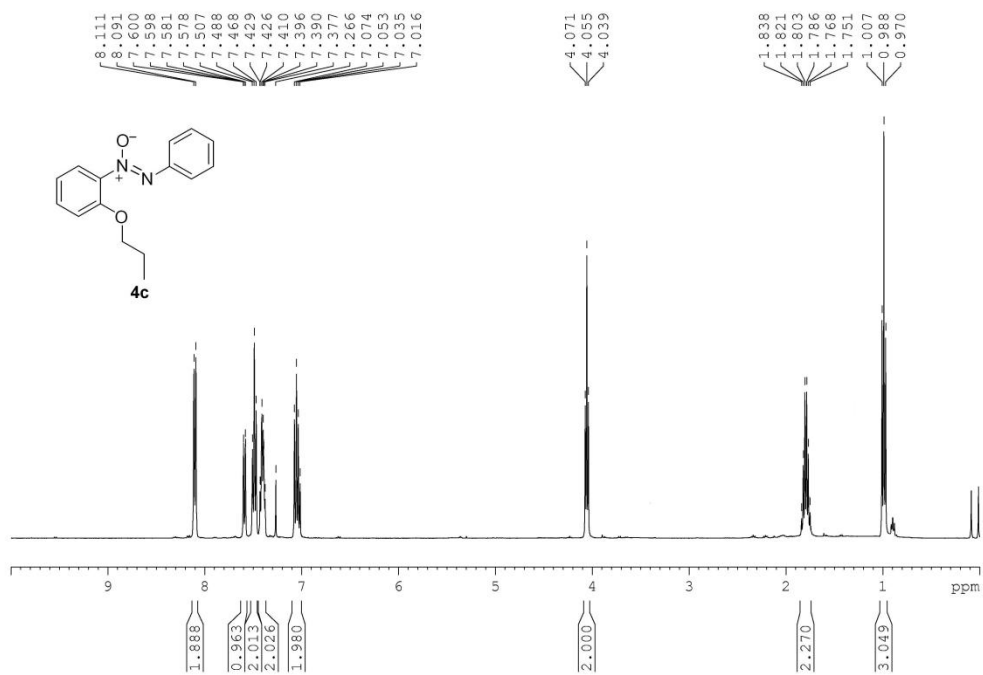

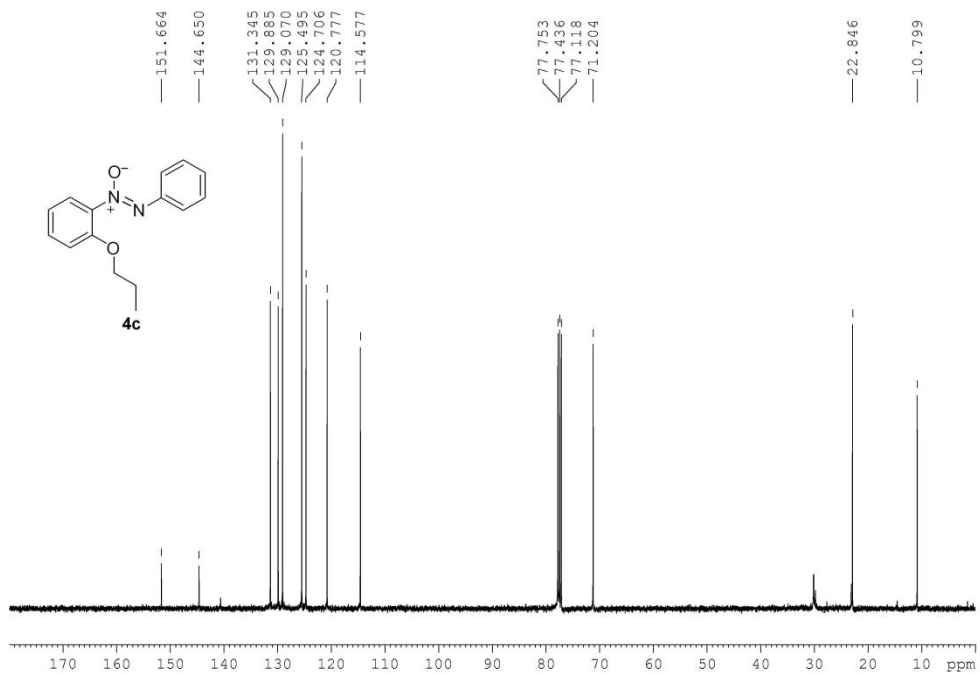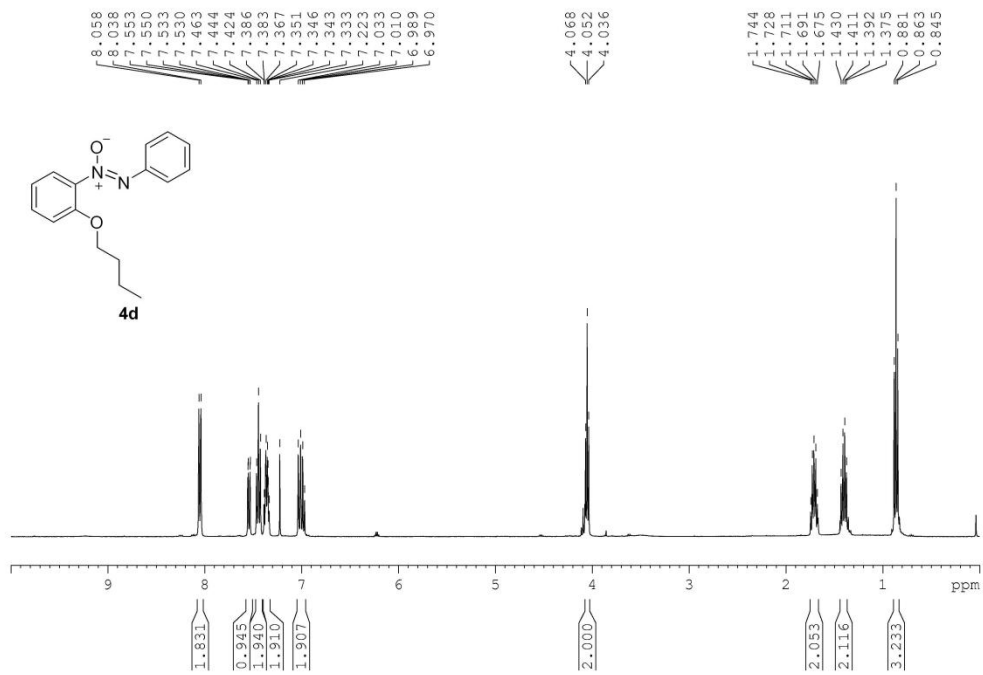

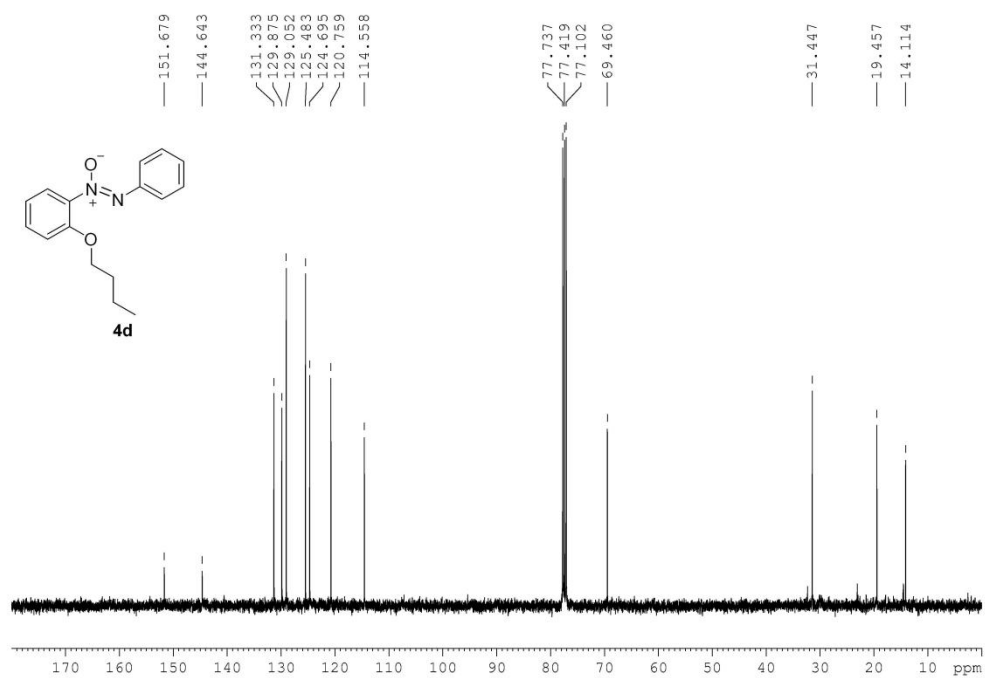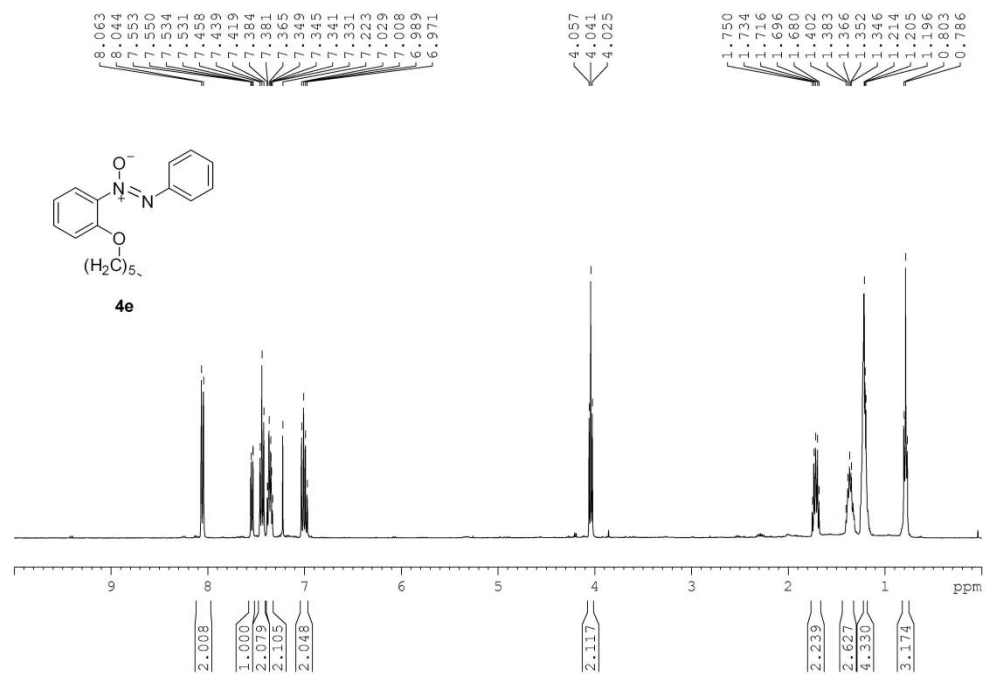



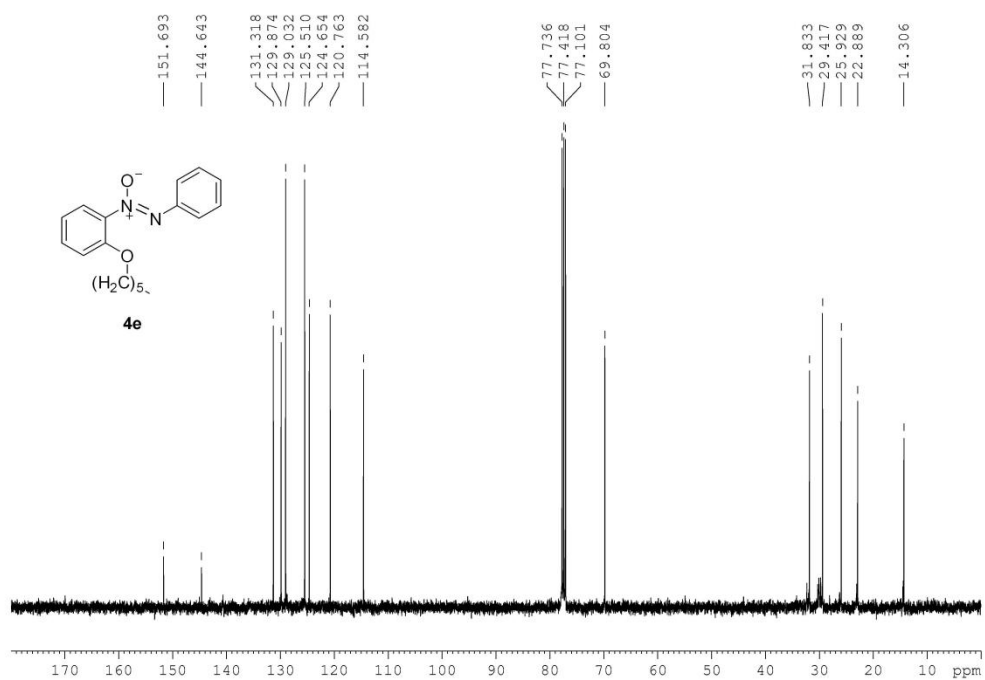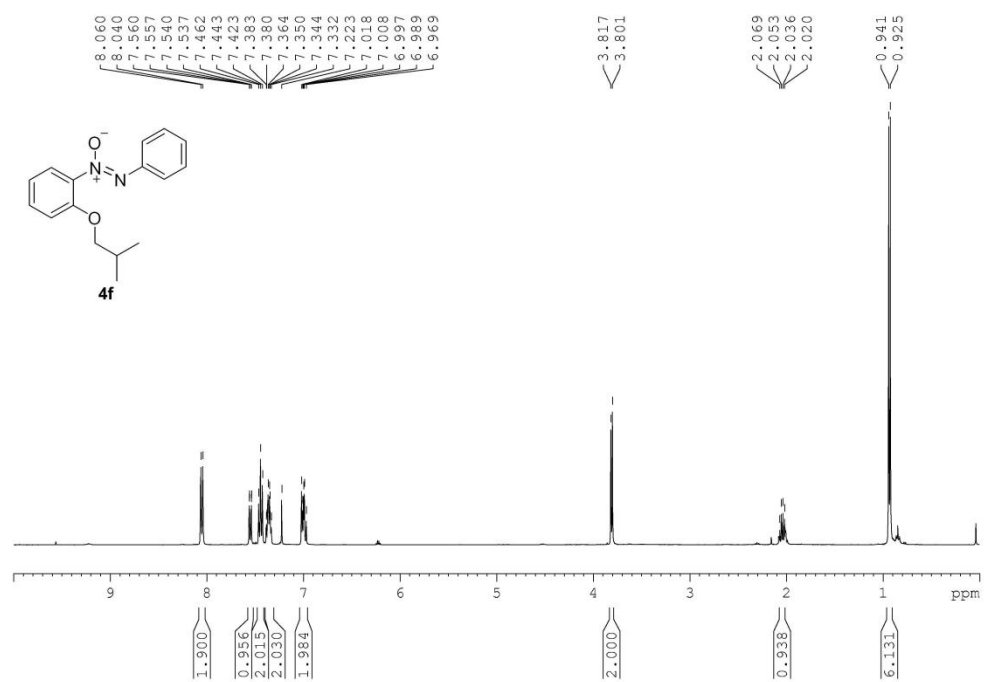

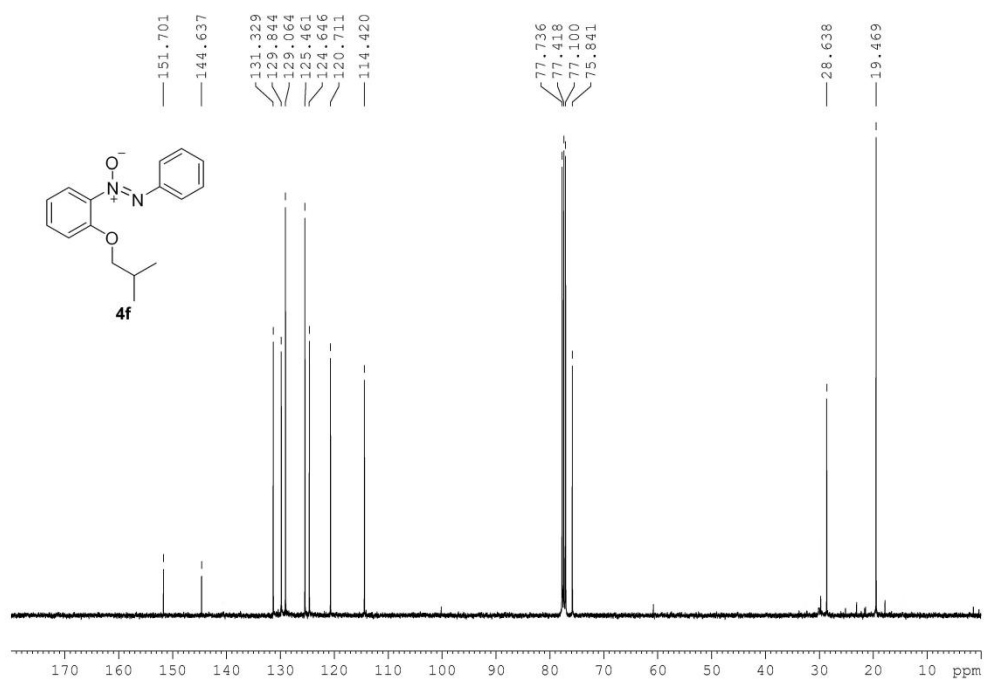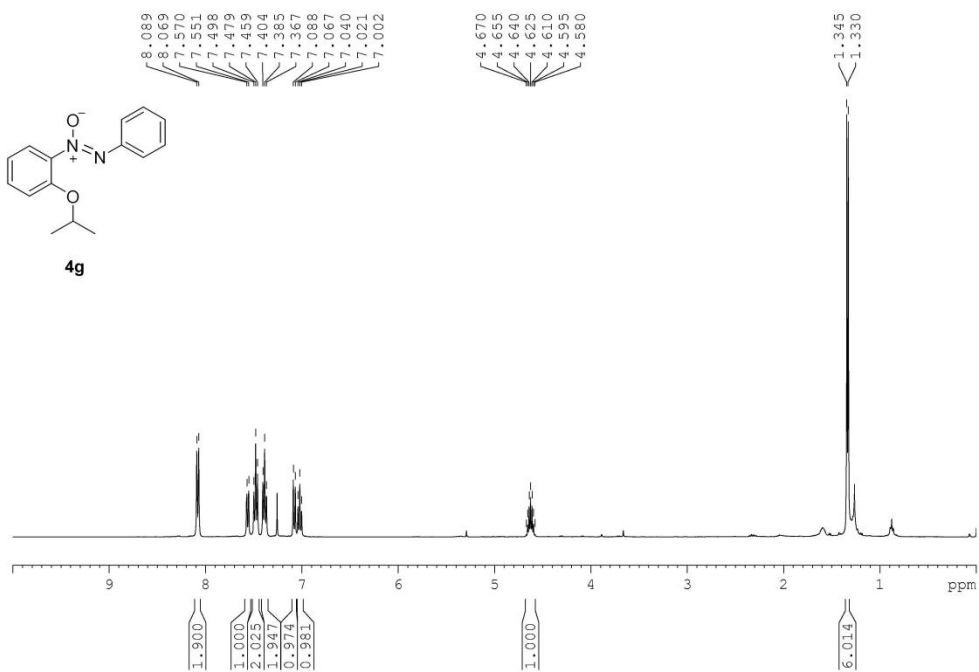

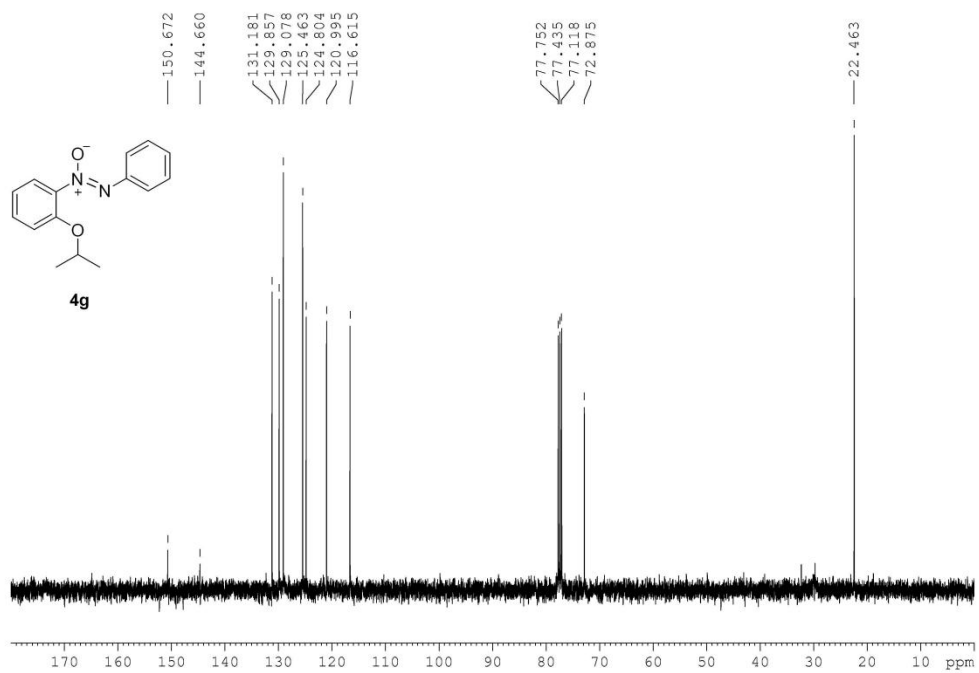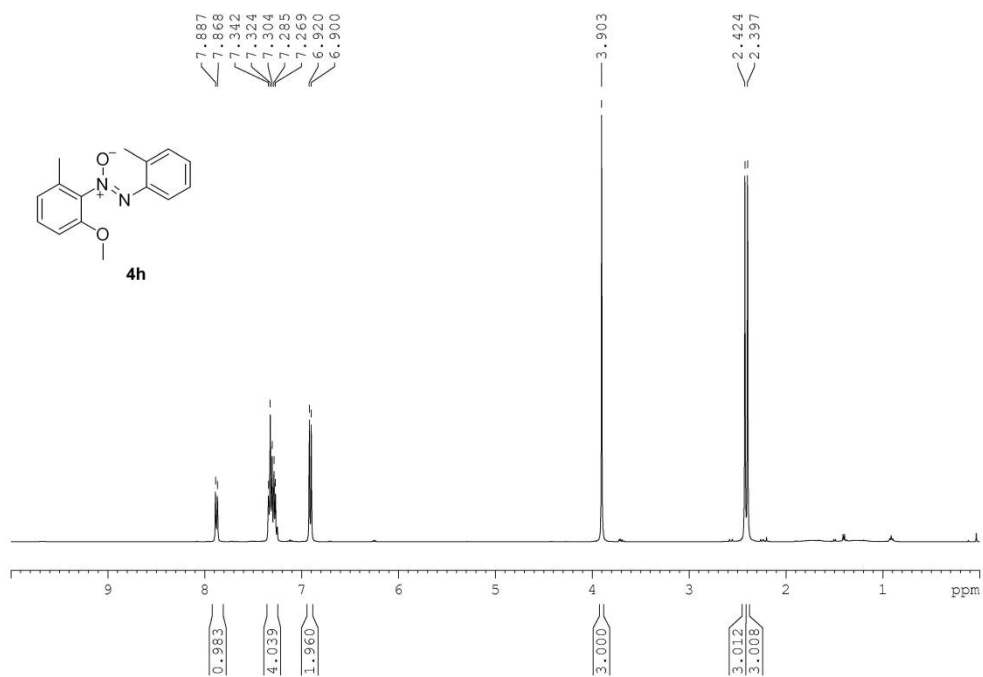

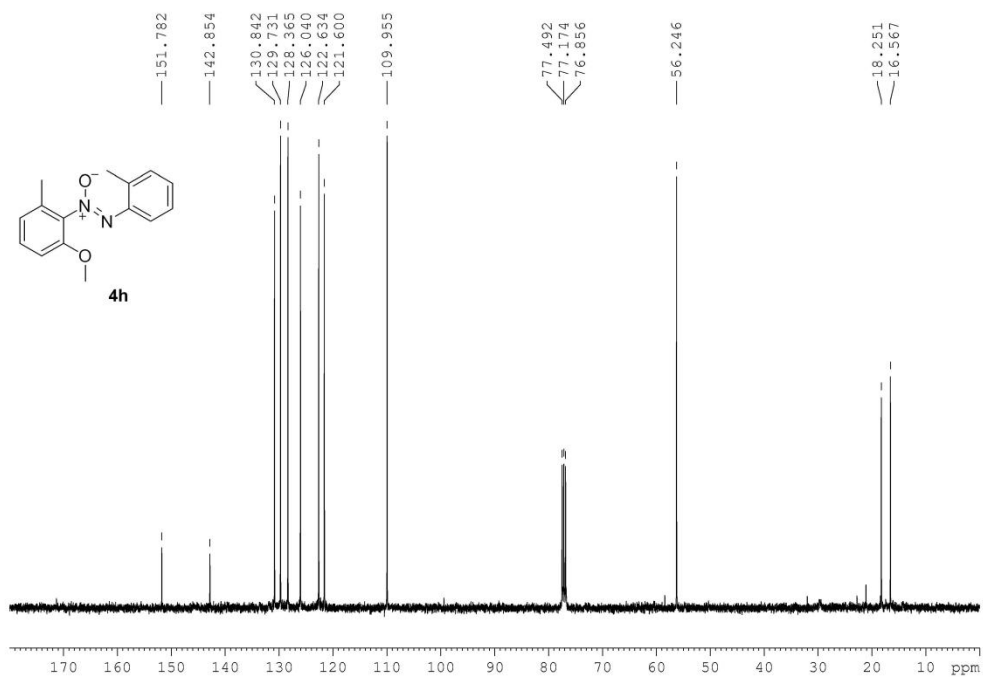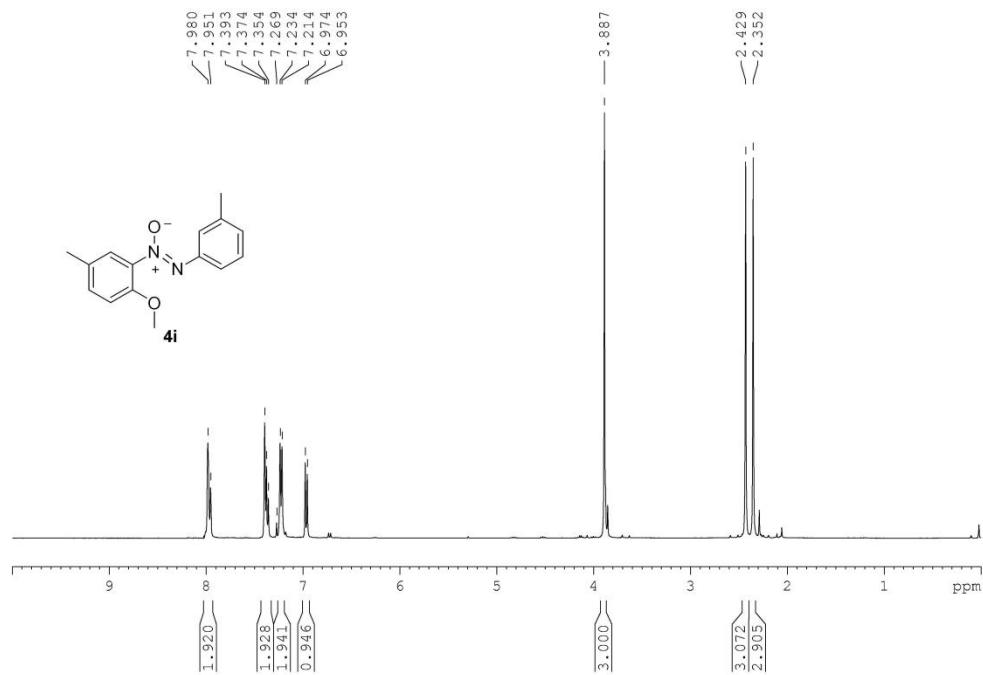

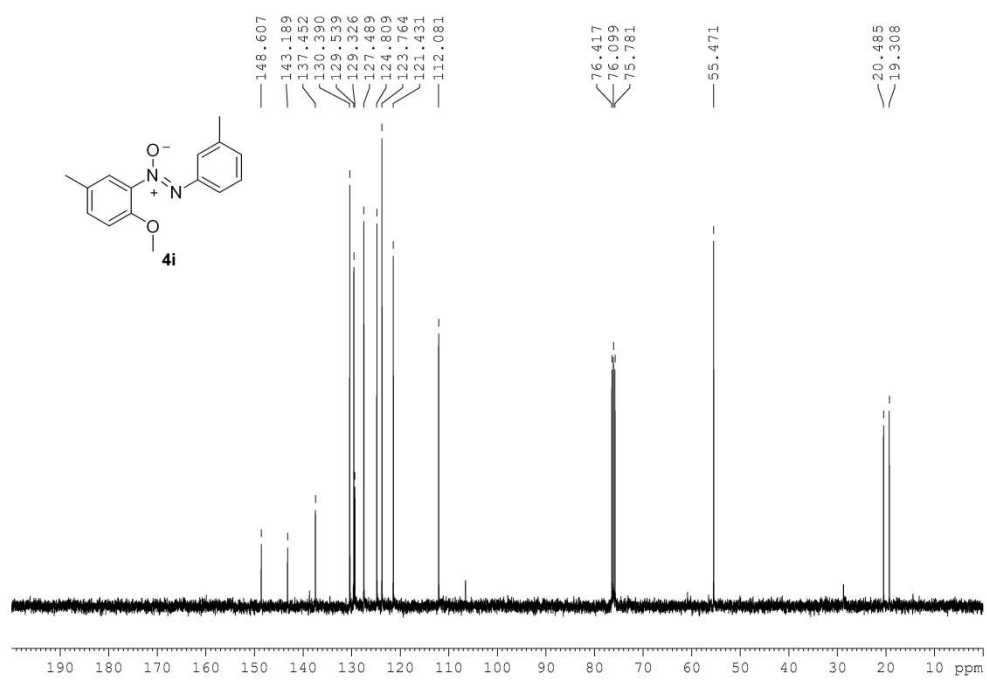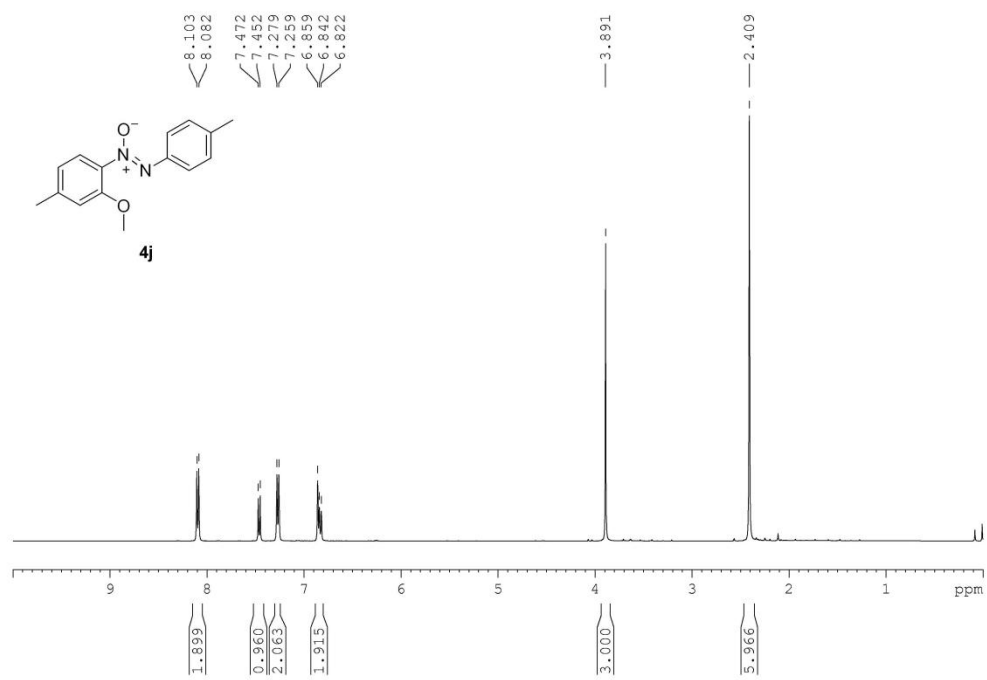

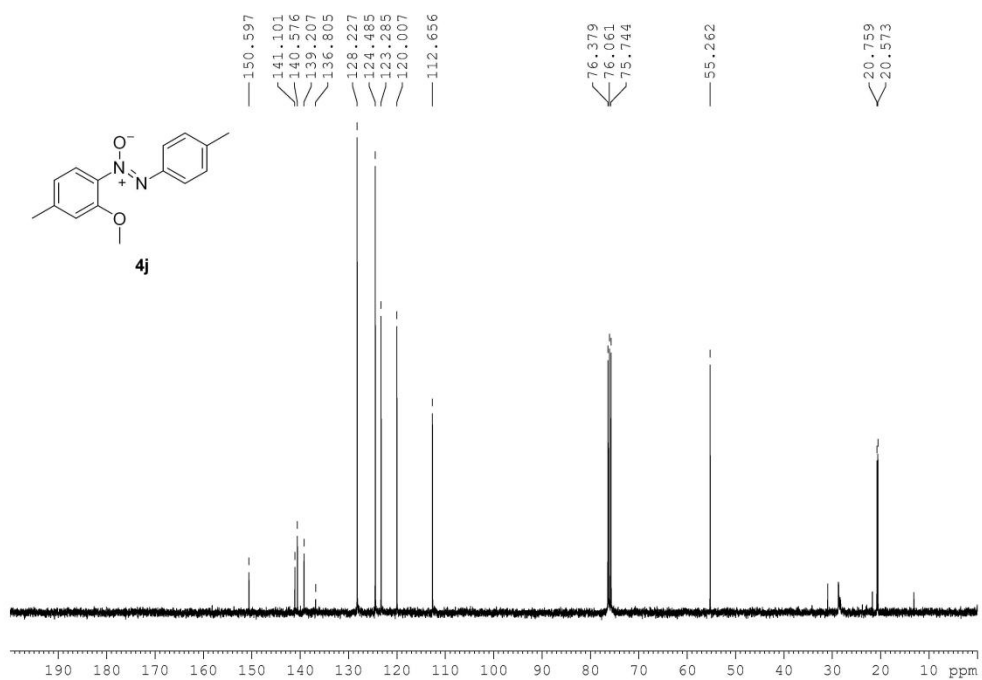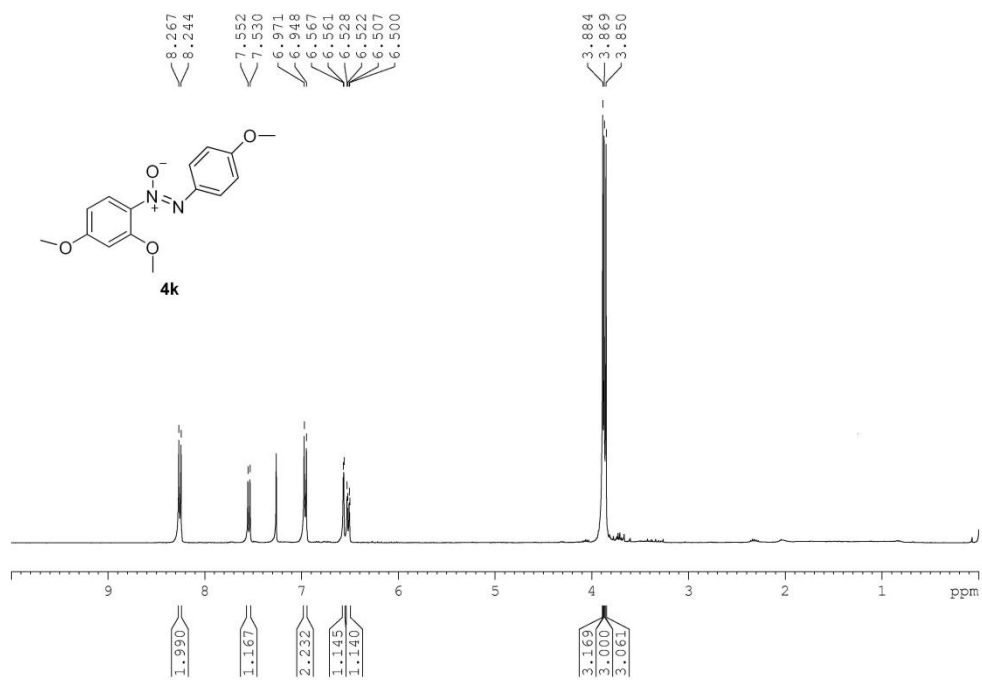

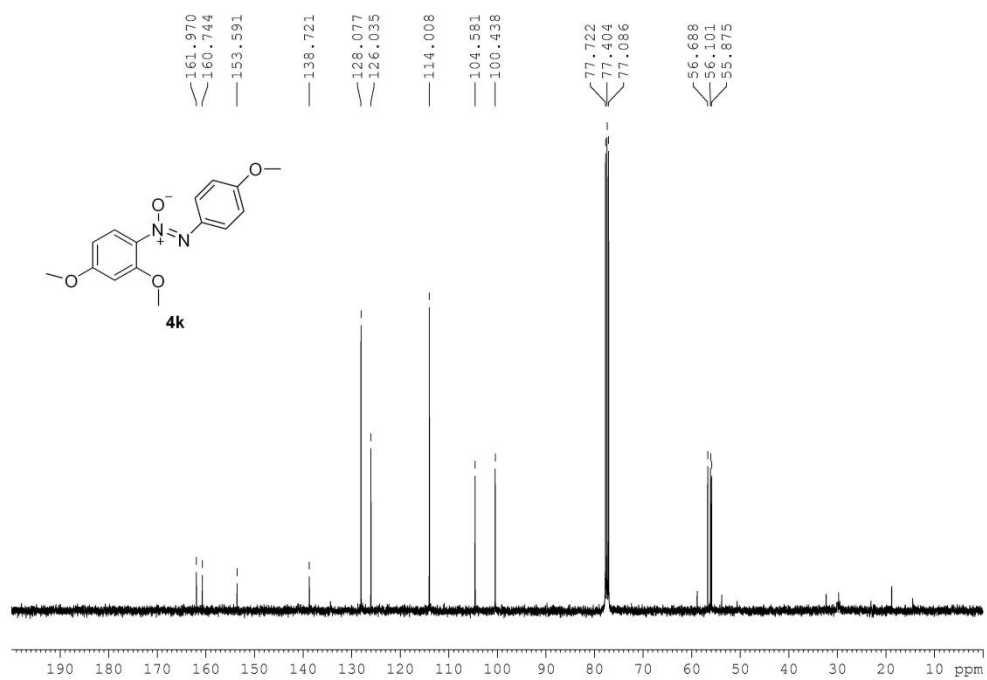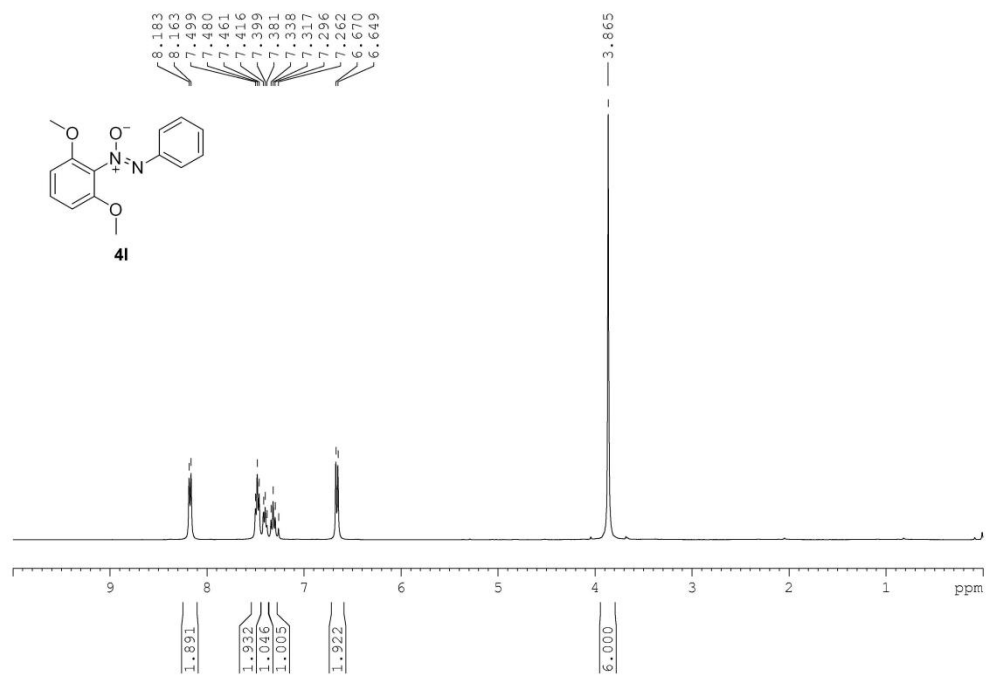

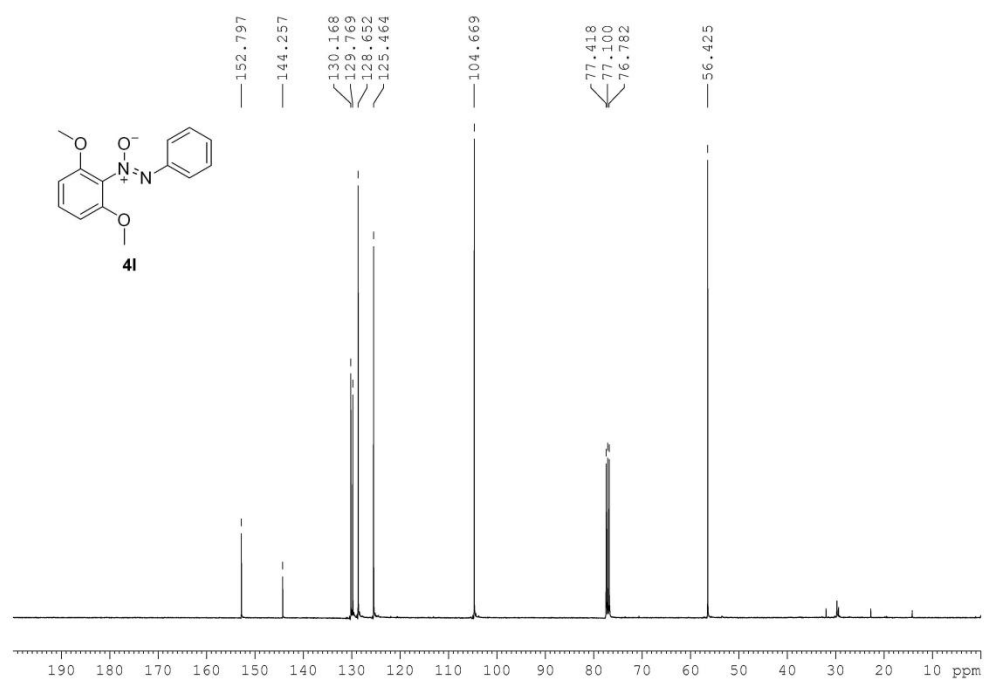

## 7. X-ray Structure of **3q**, **4l** and **Complex I**.

The structure of **3q**, **4l** and **Complex I** were determined by the X-ray diffraction. Recrystallized from EtOAc / pentane. Further information can be found in the CIF file.

- 1) The crystal of **3q** was deposited in the Cambridge Crystallographic Data Centre and assigned as CCDC **1030211**.



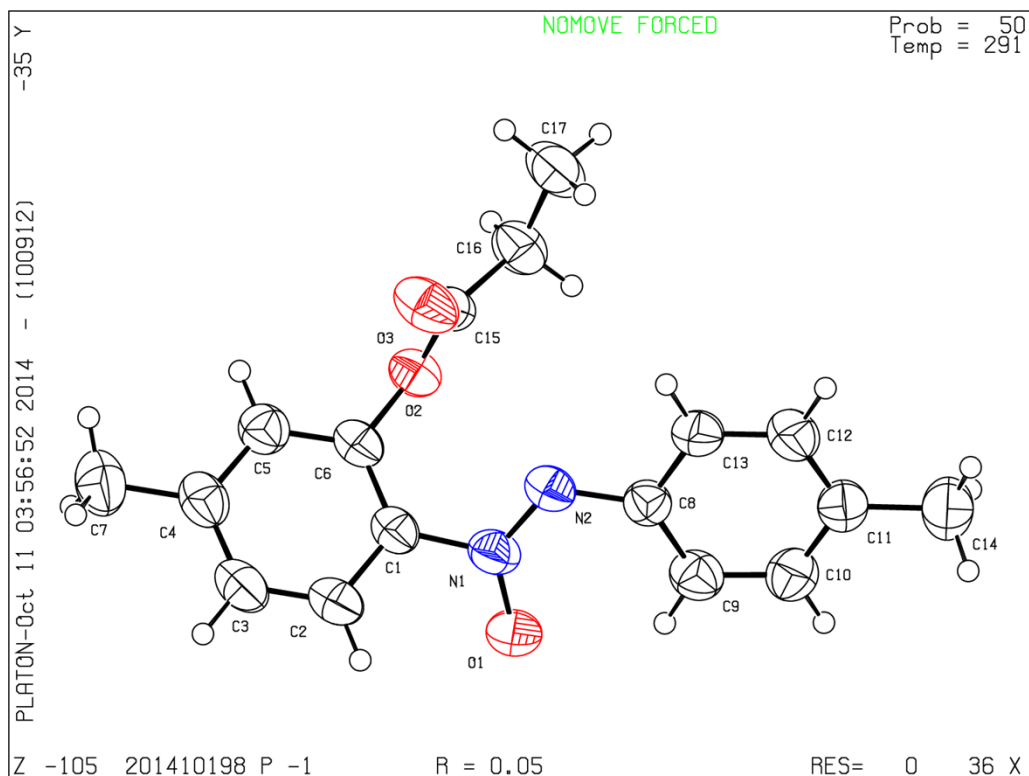

**Table 1 Crystal data and structure refinement for 201410198.**

|                                  |                                     |
|----------------------------------|-------------------------------------|
| Identification code              | 201410198                           |
| Empirical formula                | $C_{17}H_{18}N_2O_3$                |
| Formula weight                   | 298.33                              |
| Temperature/K                    | 291.15                              |
| Crystal system                   | triclinic                           |
| Space group                      | P-1                                 |
| a/Å                              | 6.8879 (9)                          |
| b/Å                              | 8.2820 (9)                          |
| c/Å                              | 14.4023 (10)                        |
| $\alpha$ /°                      | 104.655 (8)                         |
| $\beta$ /°                       | 94.121 (9)                          |
| $\gamma$ /°                      | 91.668 (10)                         |
| Volume/Å <sup>3</sup>            | 791.85 (15)                         |
| Z                                | 2                                   |
| $\rho_{\text{calc}}/\text{cm}^3$ | 1.251                               |
| $\mu/\text{mm}^{-1}$             | 0.087                               |
| F(000)                           | 316.0                               |
| Crystal size/mm <sup>3</sup>     | 0.22 × 0.2 × 0.18                   |
| Radiation                        | MoK $\alpha$ ( $\lambda$ = 0.71073) |

|                                             |                                                                         |
|---------------------------------------------|-------------------------------------------------------------------------|
| 2 $\theta$ range for data collection/°      | 5.94 to 52.78                                                           |
| Index ranges                                | -8 $\leq$ h $\leq$ 8, -10 $\leq$ k $\leq$ 10,<br>-17 $\leq$ l $\leq$ 17 |
| Reflections collected                       | 6560                                                                    |
| Independent reflections                     | 3249 [R <sub>int</sub> = 0.0200, R <sub>sigma</sub> = 0.0368]           |
| Data/restraints/parameters                  | 3249/0/202                                                              |
| Goodness-of-fit on F <sup>2</sup>           | 1.026                                                                   |
| Final R indexes [I > 2 $\sigma$ (I)]        | R <sub>1</sub> = 0.0508, wR <sub>2</sub> = 0.1181                       |
| Final R indexes [all data]                  | R <sub>1</sub> = 0.0839, wR <sub>2</sub> = 0.1377                       |
| Largest diff. peak/hole / e Å <sup>-3</sup> | 0.17/-0.15                                                              |

- 2) The crystal of **4I** was deposited in the Cambridge Crystallographic Data Centre and assigned as CCDC **1024177**.

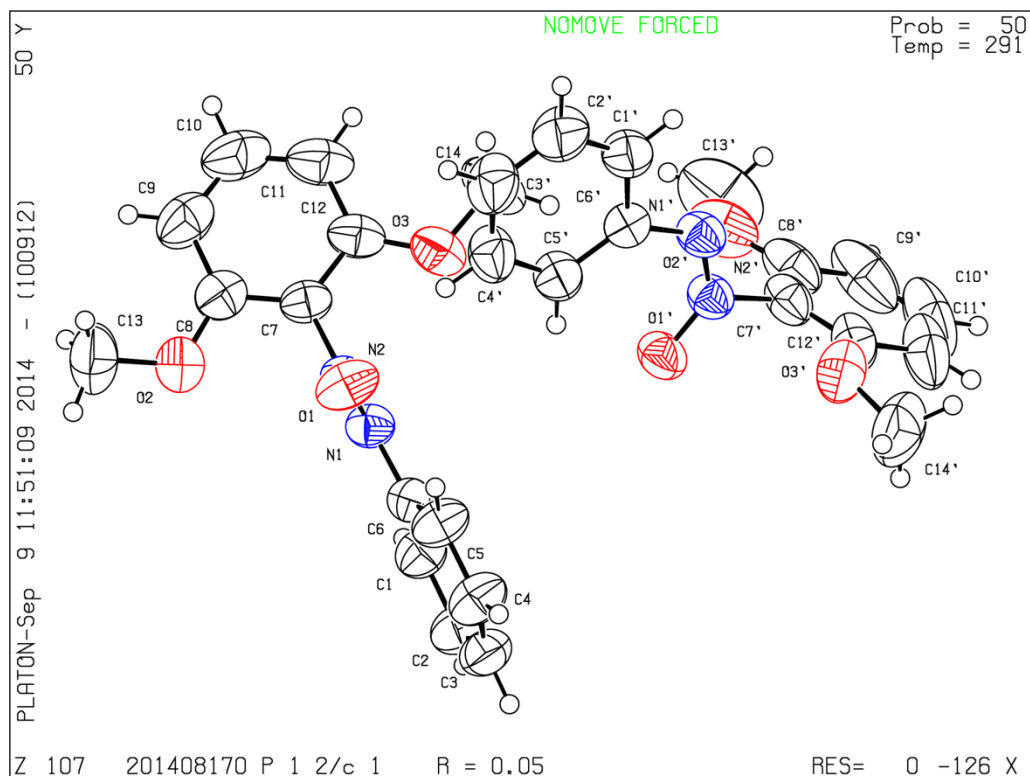

Table 1 Crystal data and structure refinement for 201408170.

Identification code 201408170

|                                             |                                                                  |
|---------------------------------------------|------------------------------------------------------------------|
| Empirical formula                           | C <sub>14</sub> H <sub>14</sub> N <sub>2</sub> O <sub>3</sub>    |
| Formula weight                              | 258.27                                                           |
| Temperature/K                               | 291.15                                                           |
| Crystal system                              | monoclinic                                                       |
| Space group                                 | P2/c                                                             |
| a/Å                                         | 12.8276 (3)                                                      |
| b/Å                                         | 8.4882 (2)                                                       |
| c/Å                                         | 24.8068 (7)                                                      |
| α /°                                        | 90.00                                                            |
| β /°                                        | 91.044 (2)                                                       |
| γ /°                                        | 90.00                                                            |
| Volume/Å <sup>3</sup>                       | 2700.61 (12)                                                     |
| Z                                           | 8                                                                |
| ρ <sub>calc</sub> /cm <sup>3</sup>          | 1.270                                                            |
| μ /mm <sup>-1</sup>                         | 0.748                                                            |
| F(000)                                      | 1088.0                                                           |
| Crystal size/mm <sup>3</sup>                | 0.2 × 0.2 × 0.16                                                 |
| Radiation                                   | CuKα (λ = 1.54184)                                               |
| 2θ range for data collection/°              | 6.9 to 144.86                                                    |
| Index ranges                                | -15 ≤ h ≤ 13, -10 ≤ k ≤ 6,<br>-28 ≤ l ≤ 30                       |
| Reflections collected                       | 10232                                                            |
| Independent reflections                     | 5224 [R <sub>int</sub> = 0.0166, R <sub>sigma</sub> =<br>0.0238] |
| Data/restraints/parameters                  | 5224/0/347                                                       |
| Goodness-of-fit on F <sup>2</sup>           | 1.026                                                            |
| Final R indexes [I > 2σ (I)]                | R <sub>1</sub> = 0.0478, wR <sub>2</sub> = 0.1264                |
| Final R indexes [all data]                  | R <sub>1</sub> = 0.0653, wR <sub>2</sub> = 0.1417                |
| Largest diff. peak/hole / e Å <sup>-3</sup> | 0.16/-0.17                                                       |

- 3) The crystal of **Complex I** was deposited in the Cambridge Crystallographic Data Centre and assigned as CCDC **1026842**.

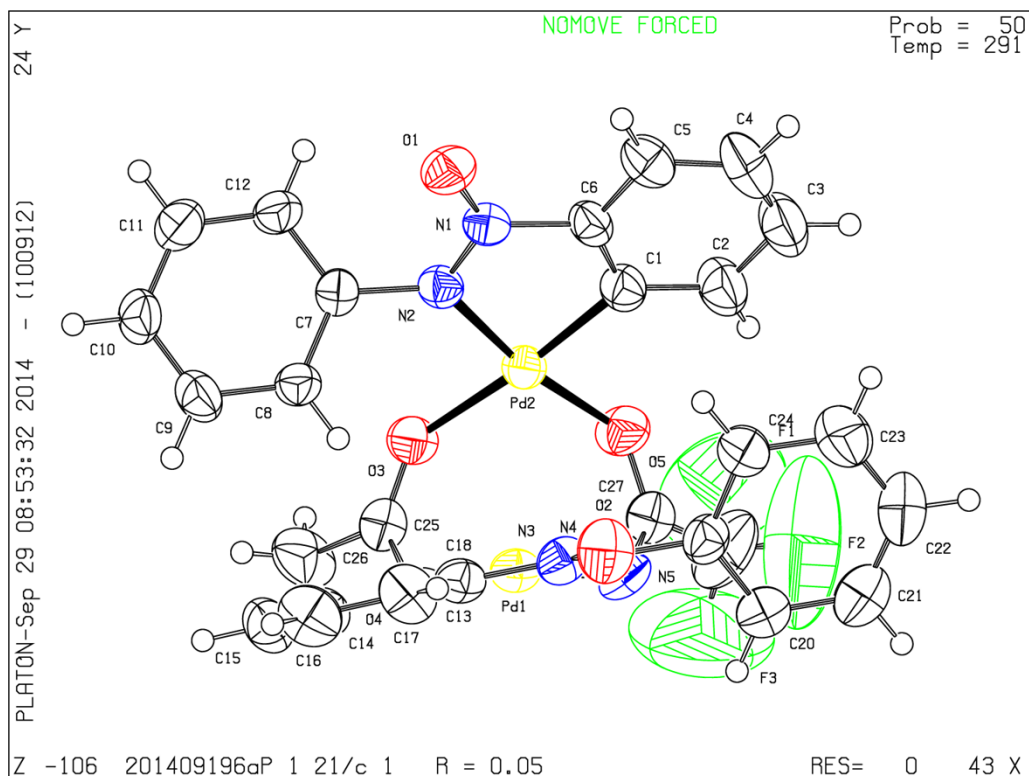

**Table 1 Crystal data and structure refinement for 201409196A.**

|                                  |                                      |
|----------------------------------|--------------------------------------|
| Identification code              | 201409196A                           |
| Empirical formula                | $C_{28}H_{21}F_3N_4O_6Pd_2$          |
| Formula weight                   | 779.29                               |
| Temperature/K                    | 291.15                               |
| Crystal system                   | monoclinic                           |
| Space group                      | $P2_1/c$                             |
| a/Å                              | 14.4863(4)                           |
| b/Å                              | 17.2032(5)                           |
| c/Å                              | 11.5651(5)                           |
| $\alpha /^\circ$                 | 90.00                                |
| $\beta /^\circ$                  | 105.969(4)                           |
| $\gamma /^\circ$                 | 90.00                                |
| Volume/Å <sup>3</sup>            | 2770.92(17)                          |
| Z                                | 4                                    |
| $\rho_{\text{calc}}/\text{cm}^3$ | 1.868                                |
| $\mu/\text{mm}^{-1}$             | 1.369                                |
| F(000)                           | 1536.0                               |
| Crystal size/mm <sup>3</sup>     | 0.2 × 0.18 × 0.1                     |
| Radiation                        | MoK $\alpha$ ( $\lambda = 0.71073$ ) |

|                                               |                                                                           |
|-----------------------------------------------|---------------------------------------------------------------------------|
| 2 $\Theta$ range for data collection/         | 5.78 to 52.74                                                             |
| Index ranges                                  | -18 $\leq$ h $\leq$ 18, -21 $\leq$ k $\leq$ 20,<br>-14 $\leq$ l $\leq$ 13 |
| Reflections collected                         | 12566                                                                     |
| Independent reflections                       | 5658 [R <sub>int</sub> = 0.0299, R <sub>sigma</sub> = 0.0486]             |
| Data/restraints/parameters                    | 5658/4/389                                                                |
| Goodness-of-fit on F <sup>2</sup>             | 1.050                                                                     |
| Final R indexes [I >= 2 $\sigma$ (I)]         | R <sub>1</sub> = 0.0518, wR <sub>2</sub> = 0.1342                         |
| Final R indexes [all data]                    | R <sub>1</sub> = 0.0723, wR <sub>2</sub> = 0.1466                         |
| Largest diff. peak/hole / e $\text{\AA}^{-3}$ | 1.17/-0.95                                                                |
